# Supplementary material for: Folic acid supplementation regulates key immunity-associated genes and pathways during the periparturient period in dairy cows
Source: PubMed Central journal article supplement (PMC7468170; doi:10.5713/ajas.18.0852), 2019-04-15
Supplement: ajas-18-0852-suppl.pdf [file ajas-18-0852-suppl.pdf]

**Supplementary file 1: List of primers used for the validation of RNA-seq results**

| <b>Gene name</b> | <b>Sequence</b>                                                |
|------------------|----------------------------------------------------------------|
| <i>CCL5</i>      | Forward: CTTTATCACCAGGAAGAAGCG<br>Reverse: GGACAAGAGCGAGAAGCAA |
| <i>NFKBIA</i>    | F:CACTAACCAGCCAGAAATCG<br>R: TGACACCAGGTCGGGATT                |
| <i>TNFSF13</i>   | F:TCTCGTTCCCATTAACATTAC<br>R: AGCAGATAAACTCCAGCATC             |
| <i>BLA-DQB</i>   | F:TGCTCTTCTATAATGCGTGCCT<br>R:ACGGGAAATGACTTGGTGACTG           |
| <i>MAPK13</i>    | F: TGCTGACAGGGAAGACGC<br>R: GGCTTTGTGGCAGGGACT                 |
| <i>SELPLG</i>    | F:CGCTACCGTTTCCTTCTACG<br>R: TCTGCGAGCACCTCAATC                |
| <i>CXCR2</i>     | F: TATGCCCTGGTCTTCTTGC<br>R:CAACCCTTTGCCTTGGAG                 |
| <i>CD4</i>       | F:GGCAACCCACTCCAGTAC<br>R: GAGGCTGAAATAGACATTGTTA              |
| <i>GAPDH</i>     | F: GGTGCTGAGTATGTGGTGGA<br>R: GGCATTGCTGACAATCTTGA             |

## Supplementary file 2. Pathways

### High folic acid treated group regulated pathways

| Term                                            | Count | P- value | Genes                                                                                                                                                                                                                                                                                                                                                                                                                                                                                                                                                                                                                                                                                                                                                                                                                                                                                                                                                                                                                                                                                                                   |
|-------------------------------------------------|-------|----------|-------------------------------------------------------------------------------------------------------------------------------------------------------------------------------------------------------------------------------------------------------------------------------------------------------------------------------------------------------------------------------------------------------------------------------------------------------------------------------------------------------------------------------------------------------------------------------------------------------------------------------------------------------------------------------------------------------------------------------------------------------------------------------------------------------------------------------------------------------------------------------------------------------------------------------------------------------------------------------------------------------------------------------------------------------------------------------------------------------------------------|
| bta04060:Cytokine-cytokine receptor interaction | 34    | 1.29E-06 | ENSBTAG00000018424, ENSBTAG00000014113, ENSBTAG00000005273, ENSBTAG00000000283, ENSBTAG00000026753, ENSBTAG00000008299, ENSBTAG00000013586, ENSBTAG00000019428, ENSBTAG00000013334, ENSBTAG00000011909, ENSBTAG00000032425, ENSBTAG00000001034, ENSBTAG00000000130, ENSBTAG00000005359, ENSBTAG00000004211, ENSBTAG00000016345, ENSBTAG00000015133, ENSBTAG00000019716, ENSBTAG00000046320, ENSBTAG00000002923, ENSBTAG00000033748, ENSBTAG00000007191, ENSBTAG00000019338, ENSBTAG00000038042, ENSBTAG00000013205, ENSBTAG00000003289, ENSBTAG00000012544, ENSBTAG00000020054, ENSBTAG00000001725, ENSBTAG00000012771, ENSBTAG00000006519, ENSBTAG00000012899, ENSBTAG00000006343, ENSBTAG00000013555, ENSBTAG00000007213, ENSBTAG00000021358, ENSBTAG00000002103, ENSBTAG00000008441, ENSBTAG00000005273, ENSBTAG00000000283, ENSBTAG00000007275, ENSBTAG00000001333, ENSBTAG00000002922, ENSBTAG00000006679, ENSBTAG00000005841, ENSBTAG00000012544, ENSBTAG00000005359, ENSBTAG00000012771, ENSBTAG00000004211, ENSBTAG00000007867, ENSBTAG00000010007, ENSBTAG00000016683, ENSBTAG00000012899, ENSBTAG00000007338, |
| bta04380:Osteoclast differentiation             | 21    | 5.78E-05 | ENSBTAG00000004386, ENSBTAG00000007115, ENSBTAG00000005989, ENSBTAG00000020527, ENSBTAG00000013527, ENSBTAG00000015571, ENSBTAG00000018281, ENSBTAG00000019512, ENSBTAG00000008541, ENSBTAG00000004288, ENSBTAG00000043553,                                                                                                                                                                                                                                                                                                                                                                                                                                                                                                                                                                                                                                                                                                                                                                                                                                                                                             |
| bta00480:Glutathione metabolism                 | 12    | 1.75E-04 | ENSBTAG00000046900, ENSBTAG00000021779, ENSBTAG00000008441, ENSBTAG00000037539, ENSBTAG00000000283, ENSBTAG00000020936, ENSBTAG00000015727, ENSBTAG00000007191, ENSBTAG00000001034, ENSBTAG00000011600, ENSBTAG00000027513, ENSBTAG00000020676, ENSBTAG00000009493, ENSBTAG00000001725, ENSBTAG00000004211, ENSBTAG00000016683, ENSBTAG00000010007, ENSBTAG00000000436,                                                                                                                                                                                                                                                                                                                                                                                                                                                                                                                                                                                                                                                                                                                                                 |
| bta04668:TNF signaling pathway                  | 17    | 3.43E-04 | ENSBTAG00000010303                                                                                                                                                                                                                                                                                                                                                                                                                                                                                                                                                                                                                                                                                                                                                                                                                                                                                                                                                                                                                                                                                                      |

|                                           |    |          |                                                                                                                                                                                                                                                                                                                                                                                                                                                                                                  |
|-------------------------------------------|----|----------|--------------------------------------------------------------------------------------------------------------------------------------------------------------------------------------------------------------------------------------------------------------------------------------------------------------------------------------------------------------------------------------------------------------------------------------------------------------------------------------------------|
| bta05150:Staphylococcus aureus infection  | 12 | 3.96E-04 | ENSBTAG00000019588, ENSBTAG00000031851, ENSBTAG00000038128, ENSBTAG00000021077, ENSBTAG00000027051, ENSBTAG00000021647, ENSBTAG00000020872, ENSBTAG00000046158, ENSBTAG00000010303, ENSBTAG00000048122, ENSBTAG00000011196, ENSBTAG00000007153, ENSBTAG00000008945, ENSBTAG00000001601, ENSBTAG000000013099, ENSBTAG00000002980, ENSBTAG00000003758, ENSBTAG00000013631, ENSBTAG00000012927, ENSBTAG00000010336, ENSBTAG00000020527, ENSBTAG00000047806, ENSBTAG00000020747, ENSBTAG00000012403, |
| bta01230:Biosynthesis of amino acids      | 13 | 8.22E-04 | ENSBTAG000000031814, ENSBTAG00000008945, ENSBTAG00000010206, ENSBTAG00000001601, ENSBTAG00000018936, ENSBTAG00000013527, ENSBTAG00000003196, ENSBTAG00000013099, ENSBTAG00000003948, ENSBTAG00000010801, ENSBTAG00000003758, ENSBTAG00000012927, ENSBTAG00000010336, ENSBTAG00000012961, ENSBTAG00000008683, ENSBTAG00000047806, ENSBTAG00000020747, ENSBTAG00000020527, ENSBTAG00000012403, ENSBTAG00000016211, ENSBTAG000000031814, ENSBTAG00000019512, ENSBTAG00000004092,                    |
| bta01130:Biosynthesis of antibiotics      | 24 | 1.31E-03 | ENSBTAG00000019315, ENSBTAG00000015821, ENSBTAG00000014113, ENSBTAG00000002767, ENSBTAG000000035587, ENSBTAG00000026753, ENSBTAG00000046320, ENSBTAG00000002923, ENSBTAG00000009812, ENSBTAG00000013586, ENSBTAG00000019428, ENSBTAG00000007932, ENSBTAG000000032425, ENSBTAG00000017839, ENSBTAG00000007191, ENSBTAG00000007193, ENSBTAG000000038042, ENSBTAG00000003289, ENSBTAG00000027513, ENSBTAG00000001725, ENSBTAG00000007867, ENSBTAG00000016683,                                       |
| bta04062:Chemokine signaling pathway      | 22 | 1.71E-03 | ENSBTAG00000015133, ENSBTAG00000019716, ENSBTAG00000019588, ENSBTAG00000014199, ENSBTAG000000038128, ENSBTAG00000021077, ENSBTAG00000001034, ENSBTAG00000012544, ENSBTAG00000005359, ENSBTAG00000007867, ENSBTAG00000020936, ENSBTAG000000033748,                                                                                                                                                                                                                                                |
| bta05321:Inflammatory bowel disease (IBD) | 12 | 1.75E-03 | ENSBTAG00000012899, ENSBTAG00000012599                                                                                                                                                                                                                                                                                                                                                                                                                                                           |

|                                     |    |          |                                                                                                                                                                                                                                                                                                                                                                                                                |
|-------------------------------------|----|----------|----------------------------------------------------------------------------------------------------------------------------------------------------------------------------------------------------------------------------------------------------------------------------------------------------------------------------------------------------------------------------------------------------------------|
|                                     |    |          | ENSBTAG00000040569, ENSBTAG00000019588, ENSBTAG00000008441, ENSBTAG00000021077, ENSBTAG00000037527, ENSBTAG0000003948, ENSBTAG00000007191, ENSBTAG00000038128, ENSBTAG00000039861, ENSBTAG00000025441, ENSBTAG00000000563, ENSBTAG00000012544, ENSBTAG00000001725, ENSBTAG00000004211, ENSBTAG00000007867, ENSBTAG00000016683, ENSBTAG00000012899, ENSBTAG00000010007, ENSBTAG00000010303, ENSBTAG00000020649, |
| bta05164:Influenza A                | 21 | 1.75E-03 | ENSBTAG00000019716<br>ENSBTAG00000019588, ENSBTAG00000021077, ENSBTAG00000000283, ENSBTAG00000009812, ENSBTAG00000012117, ENSBTAG00000019218, ENSBTAG00000007191, ENSBTAG00000038128, ENSBTAG00000000130, ENSBTAG00000003289, ENSBTAG00000005359, ENSBTAG00000010303,                                                                                                                                          |
| bta05323:Rheumatoid arthritis       | 14 | 2.53E-03 | ENSBTAG00000013170, ENSBTAG00000019716<br>ENSBTAG00000037539, ENSBTAG00000000563, ENSBTAG00000017866, ENSBTAG00000005359, ENSBTAG00000026417, ENSBTAG00000010303, ENSBTAG00000026418, ENSBTAG00000039325,                                                                                                                                                                                                      |
| bta05144:Malaria                    | 10 | 2.62E-03 | ENSBTAG00000010830, ENSBTAG00000019716<br>ENSBTAG00000047806, ENSBTAG00000013527, ENSBTAG00000019512, ENSBTAG00000013099, ENSBTAG00000003758, ENSBTAG00000012927,                                                                                                                                                                                                                                              |
| bta00030:Pentose phosphate pathway  | 7  | 3.39E-03 | ENSBTAG00000010336<br>ENSBTAG00000034848, ENSBTAG00000037539, ENSBTAG00000000563, ENSBTAG00000020602, ENSBTAG00000009789, ENSBTAG00000026417,                                                                                                                                                                                                                                                                  |
| bta05143:African trypanosomiasis    | 8  | 4.14E-03 | ENSBTAG00000010303, ENSBTAG00000026418<br>ENSBTAG00000005273, ENSBTAG00000032122, ENSBTAG00000000283, ENSBTAG00000024960, ENSBTAG00000013334, ENSBTAG00000039046, ENSBTAG00000017866, ENSBTAG00000012771, ENSBTAG00000009421, ENSBTAG00000002302, ENSBTAG00000014764, ENSBTAG00000006343,                                                                                                                      |
| bta04640:Hematopoietic cell lineage | 13 | 5.42E-03 | ENSBTAG00000004608<br>ENSBTAG00000017851, ENSBTAG00000004547, ENSBTAG00000012855, ENSBTAG00000017866, ENSBTAG00000001333, ENSBTAG00000032436, ENSBTAG00000010681, ENSBTAG00000019708, ENSBTAG00000012205, ENSBTAG00000013489,                                                                                                                                                                                  |
| bta03320:PPAR signaling pathway     | 11 | 5.66E-03 | ENSBTAG00000017542                                                                                                                                                                                                                                                                                                                                                                                             |

|                                                    |    |          |                                                                                                                                                                                                                                                                                                                                                                                              |
|----------------------------------------------------|----|----------|----------------------------------------------------------------------------------------------------------------------------------------------------------------------------------------------------------------------------------------------------------------------------------------------------------------------------------------------------------------------------------------------|
|                                                    |    |          | ENSBTAG00000019588, ENSBTAG00000021077, ENSBTAG00000020319, ENSBTAG00000038128, ENSBTAG00000025441, ENSBTAG0000000563, ENSBTAG00000005359, ENSBTAG00000012544, ENSBTAG00000007867, ENSBTAG00000004211, ENSBTAG00000016683, ENSBTAG00000012899, ENSBTAG00000010007, ENSBTAG00000020649,                                                                                                       |
| bta05145:Toxoplasmosis                             | 15 | 8.16E-03 | ENSBTAG00000004386<br>ENSBTAG00000012265, ENSBTAG00000002758, ENSBTAG00000020872, ENSBTAG00000002302, ENSBTAG00000017722, ENSBTAG00000007268, ENSBTAG00000046158, ENSBTAG00000010520, ENSBTAG00000048122, ENSBTAG00000011196,                                                                                                                                                                |
| bta04610:Complement and coagulation cascades       | 11 | 8.39E-03 | ENSBTAG00000007153<br>ENSBTAG00000012599, ENSBTAG00000011196, ENSBTAG00000007191, ENSBTAG0000000563, ENSBTAG00000003289, ENSBTAG00000012544, ENSBTAG00000009789, ENSBTAG00000005359, ENSBTAG00000004211, ENSBTAG00000012899, ENSBTAG00000010007, ENSBTAG00000016683,                                                                                                                         |
| bta05142:Chagas disease (American trypanosomiasis) | 14 | 1.19E-02 | ENSBTAG00000019716, ENSBTAG00000007153<br>ENSBTAG00000019588, ENSBTAG00000021077, ENSBTAG00000015318, ENSBTAG00000037539, ENSBTAG00000020116, ENSBTAG0000000603, ENSBTAG00000014906, ENSBTAG00000011543, ENSBTAG00000000977, ENSBTAG00000000095, ENSBTAG00000017846, ENSBTAG00000038128, ENSBTAG00000031851, ENSBTAG00000015742, ENSBTAG00000003176, ENSBTAG00000010303,                     |
| bta04514:Cell adhesion molecules (CAMs)            | 17 | 1.33E-02 | ENSBTAG00000013170<br>ENSBTAG00000019588, ENSBTAG00000021077, ENSBTAG00000017135, ENSBTAG00000012185, ENSBTAG00000020936, ENSBTAG00000012117, ENSBTAG00000019218, ENSBTAG00000008507, ENSBTAG00000038128, ENSBTAG00000006572, ENSBTAG0000000563, ENSBTAG00000012544, ENSBTAG00000005359, ENSBTAG00000004211, ENSBTAG00000007867, ENSBTAG00000024503, ENSBTAG00000012899, ENSBTAG00000010007, |
| bta05152:Tuberculosis                              | 19 | 1.37E-02 | ENSBTAG00000020649<br>ENSBTAG00000019588, ENSBTAG00000038128, ENSBTAG00000021077, ENSBTAG0000000563, ENSBTAG00000012544, ENSBTAG00000005359, ENSBTAG00000007867, ENSBTAG00000016683,                                                                                                                                                                                                         |
| bta05140:Leishmaniasis                             | 10 | 1.80E-02 | ENSBTAG00000010007, ENSBTAG00000012899                                                                                                                                                                                                                                                                                                                                                       |

|                                       |    |          |                                                                                                                                                                                                                                                                                                                                                                                                                          |
|---------------------------------------|----|----------|--------------------------------------------------------------------------------------------------------------------------------------------------------------------------------------------------------------------------------------------------------------------------------------------------------------------------------------------------------------------------------------------------------------------------|
|                                       |    |          | ENSBTAG00000014269, ENSBTAG00000019588,<br>ENSBTAG00000023730, ENSBTAG00000021013,<br>ENSBTAG00000021077, ENSBTAG00000004547,<br>ENSBTAG00000017135, ENSBTAG00000020116,<br>ENSBTAG00000021647, ENSBTAG00000001489,<br>ENSBTAG00000002177, ENSBTAG00000039992,<br>ENSBTAG00000012117, ENSBTAG00000019218,<br>ENSBTAG000000038128, ENSBTAG00000017866,                                                                    |
| bta04145:Phagosome                    | 17 | 1.96E-02 | ENSBTAG00000002885<br>ENSBTAG00000008945, ENSBTAG00000001601,<br>ENSBTAG00000013527, ENSBTAG00000013099,<br>ENSBTAG00000002980, ENSBTAG00000003758,<br>ENSBTAG00000012927, ENSBTAG00000010336,<br>ENSBTAG00000018201, ENSBTAG00000020527,<br>ENSBTAG00000047806, ENSBTAG00000031814,                                                                                                                                     |
| bta01200:Carbon metabolism            | 13 | 1.98E-02 | ENSBTAG00000019512<br>ENSBTAG00000019588, ENSBTAG00000008441,<br>ENSBTAG00000021077, ENSBTAG00000015318,<br>ENSBTAG00000007881, ENSBTAG00000020116,<br>ENSBTAG000000037527, ENSBTAG00000001066,<br>ENSBTAG00000007191, ENSBTAG000000038128,<br>ENSBTAG000000039861, ENSBTAG00000000693,<br>ENSBTAG00000000563, ENSBTAG00000012544,<br>ENSBTAG00000004211, ENSBTAG00000007867,<br>ENSBTAG00000016683, ENSBTAG00000012899, |
| bta05168:Herpes simplex infection     | 19 | 2.15E-02 | ENSBTAG00000015815<br>ENSBTAG00000017135, ENSBTAG00000011931,<br>ENSBTAG00000021829, ENSBTAG00000012442,<br>ENSBTAG00000008849, ENSBTAG00000012117,<br>ENSBTAG00000010992, ENSBTAG00000019218,<br>ENSBTAG00000015520, ENSBTAG00000000133,<br>ENSBTAG00000004436, ENSBTAG00000009506,                                                                                                                                     |
| bta04142:Lysosome                     | 14 | 2.55E-02 | ENSBTAG00000016021, ENSBTAG00000011100<br>ENSBTAG00000021358, ENSBTAG00000002103,<br>ENSBTAG00000005273, ENSBTAG000000037539,<br>ENSBTAG00000000563, ENSBTAG00000004211,<br>ENSBTAG00000016683, ENSBTAG00000000436,<br>ENSBTAG00000010303, ENSBTAG00000019634,                                                                                                                                                           |
| bta04064:NF-kappa B signaling pathway | 11 | 3.22E-02 | ENSBTAG00000019716                                                                                                                                                                                                                                                                                                                                                                                                       |

|                               |    |          |                                                                                                                                                                                                                                                                                                                                                                                                                                                                                                                                                                                                                                                                                                                                                                                                                                                                                                                                                                                                                                                                                                                                                                                                                                                   |
|-------------------------------|----|----------|---------------------------------------------------------------------------------------------------------------------------------------------------------------------------------------------------------------------------------------------------------------------------------------------------------------------------------------------------------------------------------------------------------------------------------------------------------------------------------------------------------------------------------------------------------------------------------------------------------------------------------------------------------------------------------------------------------------------------------------------------------------------------------------------------------------------------------------------------------------------------------------------------------------------------------------------------------------------------------------------------------------------------------------------------------------------------------------------------------------------------------------------------------------------------------------------------------------------------------------------------|
|                               |    |          | ENSBTAG00000006156, ENSBTAG000000031358,<br>ENSBTAG00000030333, ENSBTAG00000003196,<br>ENSBTAG00000017592, ENSBTAG00000010801,<br>ENSBTAG00000008507, ENSBTAG00000037726,<br>ENSBTAG00000032954, ENSBTAG00000007681,<br>ENSBTAG00000002346, ENSBTAG00000012519,<br>ENSBTAG00000020527, ENSBTAG00000032996,<br>ENSBTAG00000005586, ENSBTAG00000046900,<br>ENSBTAG00000008945, ENSBTAG00000009737,<br>ENSBTAG00000001154, ENSBTAG00000046750,<br>ENSBTAG00000020319, ENSBTAG00000010336,<br>ENSBTAG00000018186, ENSBTAG00000008683,<br>ENSBTAG00000011278, ENSBTAG00000020747,<br>ENSBTAG00000016211, ENSBTAG00000019708,<br>ENSBTAG00000010033, ENSBTAG00000016021,<br>ENSBTAG00000004092, ENSBTAG00000020225,<br>ENSBTAG00000009603, ENSBTAG00000006136,<br>ENSBTAG00000046152, ENSBTAG00000016206,<br>ENSBTAG00000013527, ENSBTAG00000020602,<br>ENSBTAG00000019272, ENSBTAG00000013099,<br>ENSBTAG00000003948, ENSBTAG00000002980,<br>ENSBTAG00000000087, ENSBTAG00000019218,<br>ENSBTAG00000003901, ENSBTAG00000013093,<br>ENSBTAG00000018101, ENSBTAG00000016869,<br>ENSBTAG00000011558, ENSBTAG00000004436,<br>ENSBTAG00000018201, ENSBTAG00000011990,<br>ENSBTAG00000005989, ENSBTAG00000017676,<br>ENSBTAG00000018744, ENSBTAG00000008951, |
| bta01100:Metabolic pathways   | 86 | 3.28E-02 | ENSBTAG00000000033, ENSBTAG00000047806,<br>ENSBTAG00000007684, ENSBTAG00000014595,<br>ENSBTAG00000002742, ENSBTAG00000016758,                                                                                                                                                                                                                                                                                                                                                                                                                                                                                                                                                                                                                                                                                                                                                                                                                                                                                                                                                                                                                                                                                                                     |
| bta03430:Mismatch repair      | 5  | 3.80E-02 | ENSBTAG00000016869<br>ENSBTAG00000011150, ENSBTAG00000000563,<br>ENSBTAG00000000347, ENSBTAG00000027513,<br>ENSBTAG00000003289, ENSBTAG00000015278,<br>ENSBTAG00000012544, ENSBTAG00000010007,                                                                                                                                                                                                                                                                                                                                                                                                                                                                                                                                                                                                                                                                                                                                                                                                                                                                                                                                                                                                                                                    |
| bta05132:Salmonella infection | 10 | 4.40E-02 | ENSBTAG00000012899, ENSBTAG00000019716                                                                                                                                                                                                                                                                                                                                                                                                                                                                                                                                                                                                                                                                                                                                                                                                                                                                                                                                                                                                                                                                                                                                                                                                            |

|                                                  |    |          |                                                                                                                                                                                                                                                                                                                                                                                                                                                                                                                                                                                                                          |
|--------------------------------------------------|----|----------|--------------------------------------------------------------------------------------------------------------------------------------------------------------------------------------------------------------------------------------------------------------------------------------------------------------------------------------------------------------------------------------------------------------------------------------------------------------------------------------------------------------------------------------------------------------------------------------------------------------------------|
|                                                  |    |          | ENSBTAG00000002103, ENSBTAG00000007684, ENSBTAG00000020957, ENSBTAG00000021798, ENSBTAG00000012599, ENSBTAG00000013334, ENSBTAG00000009498, ENSBTAG00000005359, ENSBTAG00000009789, ENSBTAG00000008300, ENSBTAG00000006998, ENSBTAG00000008409, ENSBTAG00000021527, ENSBTAG00000008006, ENSBTAG00000044023, ENSBTAG00000019716, ENSBTAG00000002767, ENSBTAG00000002742, ENSBTAG00000013573, ENSBTAG00000001333, ENSBTAG000000020194, ENSBTAG00000006679, ENSBTAG00000017851, ENSBTAG00000019354, ENSBTAG00000016758, ENSBTAG00000012771, ENSBTAG00000020676, ENSBTAG00000007867, ENSBTAG00000016683, ENSBTAG00000038990, |
| bta05200:Pathways in cancer                      | 32 | 4.47E-02 | ENSBTAG00000003791, ENSBTAG00000017542, ENSBTAG00000017851, ENSBTAG00000008441, ENSBTAG00000017866, ENSBTAG00000007166, ENSBTAG00000013705, ENSBTAG00000004211, ENSBTAG00000016683, ENSBTAG00000019708,                                                                                                                                                                                                                                                                                                                                                                                                                  |
| bta04920:Adipocytokine signaling pathway         | 9  | 4.61E-02 | ENSBTAG00000012205, ENSBTAG00000011990, ENSBTAG00000009737, ENSBTAG00000018281, ENSBTAG00000010033, ENSBTAG00000013298, ENSBTAG00000020319, ENSBTAG00000043553, ENSBTAG00000046900,                                                                                                                                                                                                                                                                                                                                                                                                                                      |
| bta00590:Arachidonic acid metabolism             | 9  | 5.29E-02 | ENSBTAG00000020225, ENSBTAG00000021143, ENSBTAG00000008683, ENSBTAG00000008945, ENSBTAG00000031814,                                                                                                                                                                                                                                                                                                                                                                                                                                                                                                                      |
| bta00270:Cysteine and methionine metabolism      | 6  | 6.11E-02 | ENSBTAG00000003901, ENSBTAG00000018101, ENSBTAG00000018423, ENSBTAG00000005757, ENSBTAG00000005952, ENSBTAG00000039813, ENSBTAG00000001333, ENSBTAG00000017851, ENSBTAG00000019354, ENSBTAG00000008966, ENSBTAG00000020676, ENSBTAG00000012771, ENSBTAG00000016345, ENSBTAG00000015133, ENSBTAG00000006343, ENSBTAG00000008409,                                                                                                                                                                                                                                                                                          |
| bta05202:Transcriptional misregulation in cancer | 16 | 6.74E-02 | ENSBTAG00000021527, ENSBTAG00000019716, ENSBTAG00000007191, ENSBTAG00000006572, ENSBTAG00000020936, ENSBTAG00000016683, ENSBTAG00000010007, ENSBTAG00000000436,                                                                                                                                                                                                                                                                                                                                                                                                                                                          |
| bta04621:NOD-like receptor signaling pathway     | 7  | 7.17E-02 | ENSBTAG00000019716, ENSBTAG00000017851, ENSBTAG00000014269, ENSBTAG00000008441, ENSBTAG00000039861, ENSBTAG00000007881, ENSBTAG00000037527, ENSBTAG00000010681, ENSBTAG00000004211, ENSBTAG00000007867, ENSBTAG00000016683, ENSBTAG00000010007, ENSBTAG00000031231,                                                                                                                                                                                                                                                                                                                                                      |
| bta05160:Hepatitis C                             | 13 | 7.29E-02 | ENSBTAG00000019716                                                                                                                                                                                                                                                                                                                                                                                                                                                                                                                                                                                                       |



|                                               |    |          |                                                                                                                                                                                                                                                                                         |
|-----------------------------------------------|----|----------|-----------------------------------------------------------------------------------------------------------------------------------------------------------------------------------------------------------------------------------------------------------------------------------------|
| bta04670:Leukocyte transendothelial migration | 12 | 7.31E-02 | ENSBTAG00000002103, ENSBTAG00000019627, ENSBTAG00000002411, ENSBTAG00000037539, ENSBTAG00000000603, ENSBTAG00000011473, ENSBTAG00000020676, ENSBTAG00000003176, ENSBTAG00000010007, ENSBTAG00000010303, ENSBTAG00000017846, ENSBTAG00000005557, ENSBTAG00000020747, ENSBTAG00000012403, |
| bta00220:Arginine biosynthesis                | 4  | 8.89E-02 | ENSBTAG00000002980, ENSBTAG00000013631, ENSBTAG00000013245, ENSBTAG00000019354, ENSBTAG00000007115, ENSBTAG00000015392, ENSBTAG00000009789, ENSBTAG00000018281,                                                                                                                         |
| bta04918:Thyroid hormone synthesis            | 8  | 9.38E-02 | ENSBTAG00000020455, ENSBTAG00000043553                                                                                                                                                                                                                                                  |

## Low folic acid treated group regulated pathways

| Term                                     | Count | P- value | Genes                                                                                                                                                                                                                                                                                                                                                                                                                              |
|------------------------------------------|-------|----------|------------------------------------------------------------------------------------------------------------------------------------------------------------------------------------------------------------------------------------------------------------------------------------------------------------------------------------------------------------------------------------------------------------------------------------|
| bta04514:Cell adhesion molecules (CAMs)  | 21    | 4.19E-09 | ENSBTAG00000019588, ENSBTAG00000002069, ENSBTAG00000021141, ENSBTAG00000037539, ENSBTAG00000019097, ENSBTAG00000020116, ENSBTAG00000000603, ENSBTAG00000015991, ENSBTAG00000007103, ENSBTAG00000000095, ENSBTAG00000007235, ENSBTAG00000017846, ENSBTAG00000019734, ENSBTAG00000008956, ENSBTAG00000026326, ENSBTAG00000038128, ENSBTAG00000031851, ENSBTAG00000015742, ENSBTAG00000013462, ENSBTAG00000010303, ENSBTAG00000003255 |
| bta04668:TNF signaling pathway           | 15    | 1.00E-06 | ENSBTAG00000018274, ENSBTAG00000008441, ENSBTAG00000037539, ENSBTAG00000000283, ENSBTAG00000006143, ENSBTAG00000007191, ENSBTAG00000012046, ENSBTAG00000011600, ENSBTAG00000004322, ENSBTAG00000020676, ENSBTAG00000009493, ENSBTAG00000001725, ENSBTAG00000016683, ENSBTAG00000000436, ENSBTAG00000010303                                                                                                                         |
| bta05150:Staphylococcus aureus infection | 10    | 2.42E-05 | ENSBTAG00000019588, ENSBTAG00000031851, ENSBTAG00000038128, ENSBTAG00000027051, ENSBTAG00000007103, ENSBTAG00000020872, ENSBTAG00000011193, ENSBTAG00000010303, ENSBTAG00000011196, ENSBTAG00000007153, ENSBTAG00000039046, ENSBTAG00000021141, ENSBTAG00000000283, ENSBTAG00000038496, ENSBTAG00000024960, ENSBTAG00000002699, ENSBTAG00000002302, ENSBTAG00000007558, ENSBTAG00000003255, ENSBTAG00000008956,                    |
| bta04640:Hematopoietic cell lineage      | 11    | 1.68E-04 | ENSBTAG00000004608                                                                                                                                                                                                                                                                                                                                                                                                                 |

|                                                    |    |          |                                                                                                                                                                                                                                                                                                                                 |
|----------------------------------------------------|----|----------|---------------------------------------------------------------------------------------------------------------------------------------------------------------------------------------------------------------------------------------------------------------------------------------------------------------------------------|
|                                                    |    |          | ENSBTAG00000007191, ENSBTAG00000019588, ENSBTAG000000038128, ENSBTAG00000000130, ENSBTAG00000000283, ENSBTAG00000004322, ENSBTAG00000005359, ENSBTAG00000007103,                                                                                                                                                                |
| bta05323:Rheumatoid arthritis                      | 10 | 9.83E-04 | ENSBTAG00000010303, ENSBTAG00000025250 ENSBTAG00000018317, ENSBTAG00000007191, ENSBTAG00000018274, ENSBTAG00000004322, ENSBTAG00000005359, ENSBTAG00000016683, ENSBTAG00000011193, ENSBTAG00000025250,                                                                                                                          |
| bta05142:Chagas disease (American trypanosomiasis) | 10 | 3.50E-03 | ENSBTAG00000011196, ENSBTAG00000007153 ENSBTAG000000038496, ENSBTAG00000020872, ENSBTAG00000002302, ENSBTAG00000016267, ENSBTAG00000011193, ENSBTAG00000010520,                                                                                                                                                                 |
| bta04610:Complement and coagulation cascades       | 8  | 3.60E-03 | ENSBTAG00000011196, ENSBTAG00000007153 ENSBTAG00000014113, ENSBTAG00000000283, ENSBTAG00000007558, ENSBTAG00000002923, ENSBTAG00000001338, ENSBTAG00000011909, ENSBTAG000000032425, ENSBTAG00000007191, ENSBTAG00000000130, ENSBTAG00000038042, ENSBTAG00000005359, ENSBTAG00000002699, ENSBTAG00000001725, ENSBTAG00000025250, |
| bta04060:Cytokine-cytokine receptor interaction    | 15 | 4.83E-03 | ENSBTAG00000025257 ENSBTAG00000014223, ENSBTAG00000002069, ENSBTAG00000020116, ENSBTAG00000038496, ENSBTAG00000007103, ENSBTAG00000026326, ENSBTAG00000013705, ENSBTAG00000016683, ENSBTAG00000010303, ENSBTAG00000000436, ENSBTAG00000008353, ENSBTAG00000008409,                                                              |
| bta05169:Epstein-Barr virus infection              | 13 | 5.53E-03 | ENSBTAG00000013569 ENSBTAG00000007191, ENSBTAG00000011193, ENSBTAG00000010520, ENSBTAG00000011196,                                                                                                                                                                                                                              |
| bta05020:Prion diseases                            | 5  | 1.01E-02 | ENSBTAG00000007153 ENSBTAG00000011990, ENSBTAG00000009737, ENSBTAG00000016415, ENSBTAG00000010033, ENSBTAG00000020319, ENSBTAG00000046900,                                                                                                                                                                                      |
| bta00590:Arachidonic acid metabolism               | 7  | 1.34E-02 | ENSBTAG00000006608 ENSBTAG00000005989, ENSBTAG00000001842, ENSBTAG00000010265, ENSBTAG00000004288,                                                                                                                                                                                                                              |
| bta00480:Glutathione metabolism                    | 6  | 1.46E-02 | ENSBTAG00000046900, ENSBTAG00000006608 ENSBTAG00000019588, ENSBTAG00000002069, ENSBTAG000000038128, ENSBTAG00000021141, ENSBTAG00000020116, ENSBTAG00000003255,                                                                                                                                                                 |
| bta04612:Antigen processing and presentation       | 7  | 1.52E-02 | ENSBTAG00000008956 ENSBTAG00000015991, ENSBTAG00000020676, ENSBTAG00000011820, ENSBTAG00000008353,                                                                                                                                                                                                                              |
| bta05219:Bladder cancer                            | 5  | 2.18E-02 | ENSBTAG00000008409                                                                                                                                                                                                                                                                                                              |

|                                               |    |          |                                                                                                                                                                                                                                                                                                                                                                                          |
|-----------------------------------------------|----|----------|------------------------------------------------------------------------------------------------------------------------------------------------------------------------------------------------------------------------------------------------------------------------------------------------------------------------------------------------------------------------------------------|
| bta04620:Toll-like receptor signaling pathway | 8  | 2.28E-02 | ENSBTAG00000007191, ENSBTAG00000018274, ENSBTAG00000011600, ENSBTAG00000004322, ENSBTAG00000001725, ENSBTAG00000016683, ENSBTAG00000025250, ENSBTAG00000025257, ENSBTAG00000007191, ENSBTAG00000014113, ENSBTAG00000038042, ENSBTAG0000001725, ENSBTAG00000002923, ENSBTAG00000016683, ENSBTAG00000025250, ENSBTAG00000009938, ENSBTAG00000025257, ENSBTAG0000001338, ENSBTAG00000032425 |
| bta04062:Chemokine signaling pathway          | 11 | 2.74E-02 | ENSBTAG00000008441, ENSBTAG00000012046, ENSBTAG0000000283, ENSBTAG00000008182, ENSBTAG00000004322, ENSBTAG00000005359, ENSBTAG00000001333, ENSBTAG00000016683, ENSBTAG00000004386                                                                                                                                                                                                        |
| bta04380:Osteoclast differentiation           | 9  | 2.78E-02 | ENSBTAG00000019588, ENSBTAG00000014223, ENSBTAG000000038128, ENSBTAG00000002069, ENSBTAG00000012567, ENSBTAG00000037539, ENSBTAG00000020116, ENSBTAG00000005359, ENSBTAG00000004322, ENSBTAG00000007103, ENSBTAG00000016683, ENSBTAG00000010303, ENSBTAG00000008353, ENSBTAG00000008409                                                                                                  |
| bta05166:HTLV-I infection                     | 14 | 2.93E-02 | ENSBTAG00000019588, ENSBTAG00000002069, ENSBTAG000000038128, ENSBTAG00000020116, ENSBTAG00000007103, ENSBTAG00000010303                                                                                                                                                                                                                                                                  |
| bta05416:Viral myocarditis                    | 6  | 3.76E-02 | ENSBTAG000000037539, ENSBTAG00000005359, ENSBTAG00000007103, ENSBTAG00000010303, ENSBTAG00000004917                                                                                                                                                                                                                                                                                      |
| bta05144:Malaria                              | 5  | 5.35E-02 | ENSBTAG000000021141, ENSBTAG00000011600, ENSBTAG00000004322, ENSBTAG00000013705, ENSBTAG00000016683, ENSBTAG00000003255, ENSBTAG00000012279, ENSBTAG00000021830, ENSBTAG00000016357                                                                                                                                                                                                      |
| bta04660:T cell receptor signaling pathway    | 7  | 7.06E-02 | ENSBTAG00000008956, ENSBTAG00000012279, ENSBTAG00000021830, ENSBTAG00000016357                                                                                                                                                                                                                                                                                                           |
| bta00770:Pantothenate and CoA biosynthesis    | 3  | 8.31E-02 | ENSBTAG00000025462, ENSBTAG00000017512, ENSBTAG00000044208, ENSBTAG00000011600, ENSBTAG00000003033, ENSBTAG00000004322, ENSBTAG00000005359, ENSBTAG00000016442, ENSBTAG00000020194, ENSBTAG00000020283, ENSBTAG00000013761, ENSBTAG00000008409                                                                                                                                           |
| bta04010:MAPK signaling pathway               | 12 | 8.60E-02 |                                                                                                                                                                                                                                                                                                                                                                                          |

## high vs. Low folic acid treated group regulated pathways

| Term | Count | P- value | Genes |
|------|-------|----------|-------|
|------|-------|----------|-------|

|                                                        |    |          |                                                                                                                                                                                                                                                                                                                                                                                                |
|--------------------------------------------------------|----|----------|------------------------------------------------------------------------------------------------------------------------------------------------------------------------------------------------------------------------------------------------------------------------------------------------------------------------------------------------------------------------------------------------|
|                                                        |    |          | ENSBTAG0000000273, ENSBTAG00000021141,<br>ENSBTAG00000015032, ENSBTAG00000038496,<br>ENSBTAG00000007558, ENSBTAG00000008956,<br>ENSBTAG00000011887, ENSBTAG00000039046,<br>ENSBTAG00000039366, ENSBTAG00000017866,<br>ENSBTAG00000011359, ENSBTAG00000012771,                                                                                                                                  |
| <b>bta04640:Hematopoietic cell lineage</b>             | 14 | 4.64E-06 | ENSBTAG00000014764, ENSBTAG00000006343<br>ENSBTAG00000002069, ENSBTAG00000021141,<br>ENSBTAG00000015318, ENSBTAG00000019097,<br>ENSBTAG00000015991, ENSBTAG00000014906,<br>ENSBTAG00000019734, ENSBTAG00000008956,<br>ENSBTAG00000011887, ENSBTAG00000019432,<br>ENSBTAG00000038128, ENSBTAG00000040432,                                                                                       |
| <b>bta04514:Cell adhesion molecules (CAMs)</b>         | 14 | 9.85E-04 | ENSBTAG00000013462, ENSBTAG00000003176<br>ENSBTAG00000000273, ENSBTAG00000046320,<br>ENSBTAG00000002923, ENSBTAG00000007558,<br>ENSBTAG00000033748, ENSBTAG00000019428,<br>ENSBTAG00000007191, ENSBTAG00000017664,<br>ENSBTAG00000018200, ENSBTAG00000019338,<br>ENSBTAG00000013205, ENSBTAG00000020054,<br>ENSBTAG00000012771, ENSBTAG00000004211,<br>ENSBTAG00000005077, ENSBTAG00000025257, |
| <b>bta04060:Cytokine-cytokine receptor interaction</b> | 18 | 1.16E-03 | ENSBTAG00000006343, ENSBTAG00000013555                                                                                                                                                                                                                                                                                                                                                         |

|                                                         |    |          |                                                                                                                                                                                                                                                                                                                                                                                                                                                                                                                                                                                                                                                                                                                                                                                                                                                                                                                                                                                                                                                                                                                                                                                                                                                                                                                                   |
|---------------------------------------------------------|----|----------|-----------------------------------------------------------------------------------------------------------------------------------------------------------------------------------------------------------------------------------------------------------------------------------------------------------------------------------------------------------------------------------------------------------------------------------------------------------------------------------------------------------------------------------------------------------------------------------------------------------------------------------------------------------------------------------------------------------------------------------------------------------------------------------------------------------------------------------------------------------------------------------------------------------------------------------------------------------------------------------------------------------------------------------------------------------------------------------------------------------------------------------------------------------------------------------------------------------------------------------------------------------------------------------------------------------------------------------|
|                                                         |    |          | ENSBTAG00000031358, ENSBTAG00000003196, ENSBTAG00000017592, ENSBTAG00000008507, ENSBTAG00000037726, ENSBTAG00000007681, ENSBTAG00000012510, ENSBTAG00000006393, ENSBTAG00000009737, ENSBTAG00000001154, ENSBTAG00000046750, ENSBTAG00000020319, ENSBTAG00000018186, ENSBTAG00000011325, ENSBTAG00000011278, ENSBTAG00000020747, ENSBTAG00000009733, ENSBTAG00000009639, ENSBTAG00000007003, ENSBTAG00000005105, ENSBTAG00000019708, ENSBTAG00000004092, ENSBTAG00000020225, ENSBTAG00000006136, ENSBTAG00000046152, ENSBTAG00000016206, ENSBTAG00000007668, ENSBTAG00000020602, ENSBTAG00000019272, ENSBTAG00000013099, ENSBTAG00000018192, ENSBTAG00000003948, ENSBTAG000000039962, ENSBTAG00000002980, ENSBTAG00000043568, ENSBTAG00000018201, ENSBTAG00000011990, ENSBTAG00000017676, ENSBTAG00000000033, ENSBTAG00000008951, ENSBTAG00000008428, ENSBTAG00000005725, ENSBTAG00000013301, ENSBTAG00000013631, ENSBTAG00000024107, ENSBTAG00000014642, ENSBTAG00000013489, ENSBTAG00000011545, ENSBTAG00000017665, ENSBTAG00000013013, ENSBTAG000000035998, ENSBTAG00000012403, ENSBTAG00000026768, ENSBTAG00000019315, ENSBTAG00000008216, ENSBTAG00000013298, ENSBTAG00000007191, ENSBTAG00000018200, ENSBTAG00000027513, ENSBTAG00000006143, ENSBTAG00000020676, ENSBTAG00000004211, ENSBTAG00000020936, ENSBTAG00000010007, |
| <b>bta01100:Metabolic pathways</b>                      | 56 | 3.55E-03 | ENSBTAG00000015727, ENSBTAG00000018423, ENSBTAG00000017851, ENSBTAG00000015032, ENSBTAG00000008966, ENSBTAG00000039813, ENSBTAG00000020676, ENSBTAG00000012771, ENSBTAG00000001511, ENSBTAG00000025942, ENSBTAG00000008353, ENSBTAG00000021527, ENSBTAG00000006343, ENSBTAG00000020747, ENSBTAG00000012403, ENSBTAG00000002980, ENSBTAG00000013631, ENSBTAG00000017664, ENSBTAG00000017866, ENSBTAG00000026417, ENSBTAG00000026418, ENSBTAG000000039325, ENSBTAG00000010830, ENSBTAG00000011990, ENSBTAG00000009737, ENSBTAG00000018281, ENSBTAG00000013298, ENSBTAG00000020319, ENSBTAG00000043553, ENSBTAG00000020225                                                                                                                                                                                                                                                                                                                                                                                                                                                                                                                                                                                                                                                                                                           |
| <b>bta04668:TNF signaling pathway</b>                   | 9  | 1.91E-02 |                                                                                                                                                                                                                                                                                                                                                                                                                                                                                                                                                                                                                                                                                                                                                                                                                                                                                                                                                                                                                                                                                                                                                                                                                                                                                                                                   |
| <b>bta05202:Transcriptional misregulation in cancer</b> | 12 | 1.97E-02 |                                                                                                                                                                                                                                                                                                                                                                                                                                                                                                                                                                                                                                                                                                                                                                                                                                                                                                                                                                                                                                                                                                                                                                                                                                                                                                                                   |
| <b>bta00220:Arginine biosynthesis</b>                   | 4  | 2.00E-02 |                                                                                                                                                                                                                                                                                                                                                                                                                                                                                                                                                                                                                                                                                                                                                                                                                                                                                                                                                                                                                                                                                                                                                                                                                                                                                                                                   |
| <b>bta05144:Malaria</b>                                 | 6  | 2.39E-02 |                                                                                                                                                                                                                                                                                                                                                                                                                                                                                                                                                                                                                                                                                                                                                                                                                                                                                                                                                                                                                                                                                                                                                                                                                                                                                                                                   |
| <b>bta00590:Arachidonic acid metabolism</b>             | 7  | 2.56E-02 |                                                                                                                                                                                                                                                                                                                                                                                                                                                                                                                                                                                                                                                                                                                                                                                                                                                                                                                                                                                                                                                                                                                                                                                                                                                                                                                                   |

|                                                      |    |          |                                                                                                                                                                                                                                                                                      |
|------------------------------------------------------|----|----------|--------------------------------------------------------------------------------------------------------------------------------------------------------------------------------------------------------------------------------------------------------------------------------------|
| <b>bta05143:African trypanosomiasis</b>              | 5  | 2.70E-02 | ENSBTAG00000005725, ENSBTAG00000020602,<br>ENSBTAG00000026417, ENSBTAG00000012510,<br>ENSBTAG00000026418<br>ENSBTAG00000019627, ENSBTAG00000040432,<br>ENSBTAG00000011473, ENSBTAG00000020676,<br>ENSBTAG00000013451, ENSBTAG00000003176,<br>ENSBTAG00000010007, ENSBTAG00000005077, |
| <b>bta04670:Leukocyte transendothelial migration</b> | 9  | 3.18E-02 | ENSBTAG00000005055<br>ENSBTAG00000007191, ENSBTAG00000007193,<br>ENSBTAG00000035587, ENSBTAG00000027513,<br>ENSBTAG00000046320, ENSBTAG00000002923,<br>ENSBTAG00000012510, ENSBTAG00000005077,<br>ENSBTAG00000019428, ENSBTAG00000025257,                                            |
| <b>bta04062:Chemokine signaling pathway</b>          | 11 | 6.27E-02 | ENSBTAG00000017839<br>ENSBTAG00000006752, ENSBTAG00000011325,                                                                                                                                                                                                                        |
| <b>bta00051:Fructose and mannose metabolism</b>      | 4  | 7.06E-02 | ENSBTAG00000013099, ENSBTAG00000009733                                                                                                                                                                                                                                               |

---

### Supplementary file 3. Selected pathways

#### Immunity associated pathways and genes (H vs. control)

| Gene name                                                         | Pathways                            | regulation status |
|-------------------------------------------------------------------|-------------------------------------|-------------------|
| CD274 molecule(CD274)                                             | Cell adhesion molecules (CAMs)      | D                 |
| junctional adhesion molecule 2(JAM2)                              | Cell adhesion molecules (CAMs)      | D                 |
| intercellular adhesion molecule 1(ICAM1)                          | Cell adhesion molecules (CAMs)      | D                 |
| programmed cell death 1(PDCD1)                                    | Cell adhesion molecules (CAMs)      | D                 |
| cytotoxic T-lymphocyte associated protein 4(CTLA4)                | Cell adhesion molecules (CAMs)      | D                 |
| major histocompatibility complex, class II, DQ beta(BOLA-DQB)     | Cell adhesion molecules (CAMs)      | D                 |
| vascular cell adhesion molecule 1-like(LOC534578)                 | Cell adhesion molecules (CAMs)      | D                 |
| major histocompatibility complex, class II, DQ alpha 5(BOLA-DQA5) | Cell adhesion molecules (CAMs)      | D                 |
| cell adhesion molecule 1(CADM1)                                   | Cell adhesion molecules (CAMs)      | U                 |
| junctional adhesion molecule 3(JAM3)                              | Cell adhesion molecules (CAMs)      | U                 |
| versican(VCAN)                                                    | Cell adhesion molecules (CAMs)      | U                 |
| nectin cell adhesion molecule 2(NECTIN2)                          | Cell adhesion molecules (CAMs)      | U                 |
| intercellular adhesion molecule 3(ICAM3)                          | Cell adhesion molecules (CAMs)      | U                 |
| F11 receptor(F11R)                                                | Cell adhesion molecules (CAMs)      | U                 |
| MHC class II antigen(BLA-DQB)                                     | Cell adhesion molecules (CAMs)      | U                 |
| MHC Class I JSP.1(JSP.1)                                          | Cell adhesion molecules (CAMs)      | U                 |
| selectin P ligand(SELPLG)                                         | Cell adhesion molecules (CAMs)      | U                 |
| C-X-C motif chemokine ligand 10(CXCL10)                           | Chemokine signaling pathway         | D                 |
| C-C motif chemokine 3(LOC616364)                                  | Chemokine signaling pathway         | D                 |
| C-C motif chemokine ligand 5(CCL5)                                | Chemokine signaling pathway         | D                 |
| signal transducer and activator of transcription 1, 91kDa(STAT1)  | Chemokine signaling pathway         | D                 |
| chemokine (C-C motif) ligand 8(CCL8)                              | Chemokine signaling pathway         | D                 |
| C-C motif chemokine receptor 7(CCR7)                              | Chemokine signaling pathway         | D                 |
| NFKB inhibitor alpha(NFKBIA)                                      | Chemokine signaling pathway         | D                 |
| C-X-C motif chemokine receptor 5(CXCR5)                           | Chemokine signaling pathway         | D                 |
| G protein subunit beta 4(GNB4)                                    | Chemokine signaling pathway         | U                 |
| C-X3-C motif chemokine receptor 1(CX3CR1)                         | Chemokine signaling pathway         | U                 |
| C-C motif chemokine ligand 16(CCL16)                              | Chemokine signaling pathway         | U                 |
| HCK proto-oncogene, Src family tyrosine kinase(HCK)               | Chemokine signaling pathway         | U                 |
| chemokine (C-X-C motif) ligand 5(CXCL5)                           | Chemokine signaling pathway         | U                 |
| C-C motif chemokine receptor 2(CCR2)                              | Chemokine signaling pathway         | U                 |
| T-cell lymphoma invasion and metastasis 1(TIAM1)                  | Chemokine signaling pathway         | U                 |
| chemokine (C-C motif) receptor 1(CCR1)                            | Chemokine signaling pathway         | U                 |
| C-X-C motif chemokine ligand 8(CXCL8)                             | Chemokine signaling pathway         | U                 |
| chemokine (C-X-C motif) receptor 1(CXCR1)                         | Chemokine signaling pathway         | U                 |
| chemokine (C-X-C motif) ligand 2(CXCL2)                           | Chemokine signaling pathway         | U                 |
| pro-platelet basic protein(PPBP)                                  | Chemokine signaling pathway         | U                 |
| arrestin beta 2(ARRB2)                                            | Chemokine signaling pathway         | U                 |
| C-X-C motif chemokine receptor 2(CXCR2)                           | Chemokine signaling pathway         | U                 |
| thrombomodulin(THBD)                                              | Complement and coagulation cascades | D                 |
| complement C8 gamma chain(C8G)                                    | Complement and coagulation cascades | D                 |
| CD59 molecule(CD59)                                               | Complement and coagulation cascades | U                 |
| complement C1q A chain(C1QA)                                      | Complement and coagulation cascades | U                 |
| coagulation factor XIII A chain(F13A1)                            | Complement and coagulation cascades | U                 |

|                                                                     |                                        |   |
|---------------------------------------------------------------------|----------------------------------------|---|
| complement C1q B chain(C1QB)                                        | Complement and coagulation cascades    | U |
| von Willebrand factor(VWF)                                          | Complement and coagulation cascades    | U |
| coagulation factor V(F5)                                            | Complement and coagulation cascades    | U |
| complement C5a receptor 1(C5AR1)                                    | Complement and coagulation cascades    | U |
| complement factor B(CFB)                                            | Complement and coagulation cascades    | U |
| complement factor D(CFD)                                            | Complement and coagulation cascades    | U |
| colony stimulating factor 1(CSF1)                                   | Cytokine-cytokine receptor interaction | D |
| C-X-C motif chemokine ligand 10(CXCL10)                             | Cytokine-cytokine receptor interaction | D |
| C-C motif chemokine 3(LOC616364)                                    | Cytokine-cytokine receptor interaction | D |
| TNF receptor superfamily member 25(TNFRSF25)                        | Cytokine-cytokine receptor interaction | D |
| C-C motif chemokine ligand 5(CCL5)                                  | Cytokine-cytokine receptor interaction | D |
| interleukin 20 receptor subunit beta(IL20RB)                        | Cytokine-cytokine receptor interaction | D |
| chemokine (C-C motif) ligand 8(CCL8)                                | Cytokine-cytokine receptor interaction | D |
| C-C motif chemokine receptor 7(CCR7)                                | Cytokine-cytokine receptor interaction | D |
| interleukin 2 receptor subunit beta(IL2RB)                          | Cytokine-cytokine receptor interaction | D |
| atypical chemokine receptor 3(ACKR3)                                | Cytokine-cytokine receptor interaction | D |
| TNF receptor superfamily member 21(TNFRSF21)                        | Cytokine-cytokine receptor interaction | D |
| C-X-C motif chemokine receptor 5(CXCR5)                             | Cytokine-cytokine receptor interaction | D |
| tumor necrosis factor superfamily member 13(TNFSF13)                | Cytokine-cytokine receptor interaction | U |
| interleukin 18 receptor 1(IL18R1)                                   | Cytokine-cytokine receptor interaction | U |
| C-X3-C motif chemokine receptor 1(CX3CR1)                           | Cytokine-cytokine receptor interaction | U |
| TNF receptor superfamily member 1A(TNFRSF1A)                        | Cytokine-cytokine receptor interaction | U |
| interleukin 1 receptor type 1(IL1R1)                                | Cytokine-cytokine receptor interaction | U |
| transforming growth factor beta 2(TGFB2)                            | Cytokine-cytokine receptor interaction | U |
| interleukin 1 receptor type 2(IL1R2)                                | Cytokine-cytokine receptor interaction | U |
| activin A receptor type 1(ACVR1)                                    | Cytokine-cytokine receptor interaction | U |
| interferon gamma receptor 1(IFNGR1)                                 | Cytokine-cytokine receptor interaction | U |
| colony stimulating factor 1 receptor(CSF1R)                         | Cytokine-cytokine receptor interaction | U |
| interferon gamma receptor 2 (interferon gamma transducer 1)(IFNGR2) | Cytokine-cytokine receptor interaction | U |
| interleukin 1 receptor accessory protein(IL1RAP)                    | Cytokine-cytokine receptor interaction | U |
| colony stimulating factor 3 receptor(CSF3R)                         | Cytokine-cytokine receptor interaction | U |
| activin A receptor type 1B(ACVR1B)                                  | Cytokine-cytokine receptor interaction | U |
| C-C motif chemokine receptor 2(CCR2)                                | Cytokine-cytokine receptor interaction | U |
| interleukin 13 receptor, alpha 1(IL13RA1)                           | Cytokine-cytokine receptor interaction | U |
| chemokine (C-C motif) receptor 1(CCR1)                              | Cytokine-cytokine receptor interaction | U |
| C-X-C motif chemokine ligand 8(CXCL8)                               | Cytokine-cytokine receptor interaction | U |
| chemokine (C-X-C motif) receptor 1(CXCR1)                           | Cytokine-cytokine receptor interaction | U |
| pro-platelet basic protein(PPBP)                                    | Cytokine-cytokine receptor interaction | U |
| interleukin 18 receptor accessory protein(IL18RAP)                  | Cytokine-cytokine receptor interaction | U |
| C-X-C motif chemokine receptor 2(CXCR2)                             | Cytokine-cytokine receptor interaction | U |
| colony stimulating factor 1(CSF1)                                   | Hematopoietic cell lineage             | D |
| CD19 molecule(CD19)                                                 | Hematopoietic cell lineage             | D |
| CD59 molecule(CD59)                                                 | Hematopoietic cell lineage             | U |
| CD33 antigen-like(LOC100138951)                                     | Hematopoietic cell lineage             | U |
| interleukin 1 receptor type 1(IL1R1)                                | Hematopoietic cell lineage             | U |
| interleukin 1 receptor type 2(IL1R2)                                | Hematopoietic cell lineage             | U |
| CD1e molecule(CD1E)                                                 | Hematopoietic cell lineage             | U |
| colony stimulating factor 1 receptor(CSF1R)                         | Hematopoietic cell lineage             | U |
| colony stimulating factor 3 receptor(CSF3R)                         | Hematopoietic cell lineage             | U |
| CD9 molecule(CD9)                                                   | Hematopoietic cell lineage             | U |
| CD36 molecule(CD36)                                                 | Hematopoietic cell lineage             | U |



|                                                                     |                              |   |
|---------------------------------------------------------------------|------------------------------|---|
| antigen-presenting glycoprotein CD1d(LOC782367)                     | Hematopoietic cell lineage   | U |
| CD24 molecule(CD24)                                                 | Hematopoietic cell lineage   | U |
| TNF alpha induced protein 3(TNFAIP3)                                | NF-kappa B signaling pathway | D |
| phospholipase C gamma 2(PLCG2)                                      | NF-kappa B signaling pathway | D |
| intercellular adhesion molecule 1(ICAM1)                            | NF-kappa B signaling pathway | D |
| NFKB inhibitor alpha(NFKBIA)                                        | NF-kappa B signaling pathway | D |
| p53-induced death domain protein 1(PIDD1)                           | NF-kappa B signaling pathway | D |
| B-cell linker(BLNK)                                                 | NF-kappa B signaling pathway | D |
| vascular cell adhesion molecule 1-like(LOC534578)                   | NF-kappa B signaling pathway | D |
| myeloid differentiation primary response 88(MYD88)                  | NF-kappa B signaling pathway | U |
| TNF receptor superfamily member 1A(TNFRSF1A)                        | NF-kappa B signaling pathway | U |
| interleukin 1 receptor type 1(IL1R1)                                | NF-kappa B signaling pathway | U |
| C-X-C motif chemokine ligand 8(CXCL8)                               | NF-kappa B signaling pathway | U |
| phospholipase C gamma 2(PLCG2)                                      | Pathways in cancer           | D |
| lysophosphatidic acid receptor 3(LPAR3)                             | Pathways in cancer           | D |
| mutS homolog 3(MSH3)                                                | Pathways in cancer           | D |
| signal transducer and activator of transcription 1,<br>91kDa(STAT1) | Pathways in cancer           | D |
| RAS guanyl releasing protein 3(RASGRP3)                             | Pathways in cancer           | D |
| v-myc avian myelocytomatosis viral oncogene<br>homolog(MYC)         | Pathways in cancer           | D |
| SMAD family member 3(SMAD3)                                         | Pathways in cancer           | D |
| baculoviral IAP repeat containing 5(BIRC5)                          | Pathways in cancer           | D |
| NFKB inhibitor alpha(NFKBIA)                                        | Pathways in cancer           | D |
| mutL homolog 1(MLH1)                                                | Pathways in cancer           | D |
| fibroblast growth factor 13(FGF13)                                  | Pathways in cancer           | D |
| frizzled class receptor 5(FZD5)                                     | Pathways in cancer           | D |
| erb-b2 receptor tyrosine kinase 2(ERBB2)                            | Pathways in cancer           | D |
| TNF receptor associated factor 4(TRAF4)                             | Pathways in cancer           | D |
| cyclin dependent kinase 6(CDK6)                                     | Pathways in cancer           | D |
| peroxisome proliferator activated receptor gamma(PPARG)             | Pathways in cancer           | U |
| mutS homolog 2(MSH2)                                                | Pathways in cancer           | U |
| G protein subunit beta 4(GNB4)                                      | Pathways in cancer           | U |
| transforming growth factor beta 2(TGFB2)                            | Pathways in cancer           | U |
| melanogenesis associated transcription factor(MITF)                 | Pathways in cancer           | U |
| RAS guanyl releasing protein 4(RASGRP4)                             | Pathways in cancer           | U |
| fibronectin 1(FN1)                                                  | Pathways in cancer           | U |
| phosphatase and tensin homolog(PTEN)                                | Pathways in cancer           | U |
| G protein subunit alpha q(GNAQ)                                     | Pathways in cancer           | U |
| colony stimulating factor 1 receptor(CSF1R)                         | Pathways in cancer           | U |
| colony stimulating factor 3 receptor(CSF3R)                         | Pathways in cancer           | U |
| peroxisome proliferator activated receptor delta(PPARD)             | Pathways in cancer           | U |
| retinoid X receptor alpha(RXRA)                                     | Pathways in cancer           | U |
| paired box 8(PAX8)                                                  | Pathways in cancer           | U |
| C-X-C motif chemokine ligand 8(CXCL8)                               | Pathways in cancer           | U |
| matrix metalloproteinase 9(MMP9)                                    | Pathways in cancer           | U |
| insulin like growth factor 1 receptor(IGF1R)                        | Pathways in cancer           | U |
| carnitine palmitoyltransferase 1C(CPT1C)                            | PPAR signaling pathway       | D |
| ubiquitin C(UBC)                                                    | PPAR signaling pathway       | D |
| peroxisome proliferator activated receptor gamma(PPARG)             | PPAR signaling pathway       | U |
| oxidized low density lipoprotein receptor 1(OLR1)                   | PPAR signaling pathway       | U |
| nuclear receptor subfamily 1 group H member 3(NR1H3)                | PPAR signaling pathway       | U |

|                                                                   |                                 |   |
|-------------------------------------------------------------------|---------------------------------|---|
| lipoprotein lipase(LPL)                                           | PPAR signaling pathway          | U |
| cytochrome P450, family 27, subfamily A, polypeptide 1(CYP27A1)   | PPAR signaling pathway          | U |
| peroxisome proliferator activated receptor delta(PPARD)           | PPAR signaling pathway          | U |
| retinoid X receptor alpha(RXRA)                                   | PPAR signaling pathway          | U |
| CD36 molecule(CD36)                                               | PPAR signaling pathway          | U |
| acyl-CoA synthetase long-chain family member 6(ACSL6)             | PPAR signaling pathway          | U |
| intercellular adhesion molecule 1(ICAM1)                          | Staphylococcus aureus infection | D |
| major histocompatibility complex, class II, DQ beta(BOLA-DQB)     | Staphylococcus aureus infection | D |
| major histocompatibility complex, class II, DQ alpha 5(BOLA-DQA5) | Staphylococcus aureus infection | D |
| complement C1q A chain(C1QA)                                      | Staphylococcus aureus infection | U |
| complement C1q B chain(C1QB)                                      | Staphylococcus aureus infection | U |
| MHC class II antigen(BLA-DQB)                                     | Staphylococcus aureus infection | U |
| complement C5a receptor 1(C5AR1)                                  | Staphylococcus aureus infection | U |
| Fc fragment of IgA receptor(FCAR)                                 | Staphylococcus aureus infection | U |
| platelet activating factor receptor(PTAFR)                        | Staphylococcus aureus infection | U |
| selectin P ligand(SELPLG)                                         | Staphylococcus aureus infection | U |
| complement factor B(CFB)                                          | Staphylococcus aureus infection | U |
| complement factor D(CFD)                                          | Staphylococcus aureus infection | U |
| colony stimulating factor 1(CSF1)                                 | TNF signaling pathway           | D |
| TNF alpha induced protein 3(TNFAIP3)                              | TNF signaling pathway           | D |
| C-X-C motif chemokine ligand 10(CXCL10)                           | TNF signaling pathway           | D |
| C-C motif chemokine ligand 5(CCL5)                                | TNF signaling pathway           | D |
| suppressor of cytokine signaling 3(SOCS3)                         | TNF signaling pathway           | D |
| B-cell CLL/lymphoma 3(BCL3)                                       | TNF signaling pathway           | D |
| intercellular adhesion molecule 1(ICAM1)                          | TNF signaling pathway           | D |
| mitogen-activated protein kinase kinase kinase 8(MAP3K8)          | TNF signaling pathway           | D |
| interferon gamma inducible protein 47(IFI47)                      | TNF signaling pathway           | D |
| NFKB inhibitor alpha(NFKBIA)                                      | TNF signaling pathway           | D |
| vascular cell adhesion molecule 1-like(LOC534578)                 | TNF signaling pathway           | D |
| interleukin 18 receptor 1(IL18R1)                                 | TNF signaling pathway           | U |
| TNF receptor superfamily member 1A(TNFRSF1A)                      | TNF signaling pathway           | U |
| mitogen-activated protein kinase 13(MAPK13)                       | TNF signaling pathway           | U |
| matrix metalloproteinase 9(MMP9)                                  | TNF signaling pathway           | U |
| nucleotide binding oligomerization domain containing 2(NOD2)      | TNF signaling pathway           | U |
| chemokine (C-X-C motif) ligand 2(CXCL2)                           | TNF signaling pathway           | U |

### **Immunity associated pathways and genes (L vs. control)**

| Gene names                                           | Groups                                          | Regulation status |
|------------------------------------------------------|-------------------------------------------------|-------------------|
| colony stimulating factor 1(CSF1)                    | bta04060:Cytokine-cytokine receptor interaction | D                 |
| C-X-C motif chemokine ligand 10(CXCL10)              | bta04060:Cytokine-cytokine receptor interaction | D                 |
| KIT proto-oncogene receptor tyrosine kinase(KIT)     | bta04060:Cytokine-cytokine receptor interaction | D                 |
| tumor necrosis factor superfamily member 13(TNFSF13) | bta04060:Cytokine-cytokine receptor interaction | U                 |
| C-C motif chemokine receptor 3(CCR3)                 | bta04060:Cytokine-cytokine receptor interaction | U                 |
| C-X3-C motif chemokine receptor 1(CX3CR1)            | bta04060:Cytokine-cytokine receptor interaction | U                 |
| transforming growth factor beta 2(TGFB2)             | bta04060:Cytokine-cytokine receptor interaction | U                 |
| C-C motif chemokine ligand 5(CCL5)                   | bta04060:Cytokine-cytokine receptor interaction | U                 |
| C-X-C motif chemokine ligand 10(CXCL10)              | bta04062:Chemokine signaling pathway            | D                 |
| chemokine (C motif) ligand 1(XCL1)                   | bta04062:Chemokine signaling pathway            | D                 |

|                                                                   |                                              |   |
|-------------------------------------------------------------------|----------------------------------------------|---|
| chemokine (C-C motif) ligand 8(CCL8)                              | bta04062:Chemokine signaling pathway         | D |
| NFKB inhibitor alpha(NFKBIA)                                      | bta04062:Chemokine signaling pathway         | D |
| C-C motif chemokine receptor 3(CCR3)                              | bta04062:Chemokine signaling pathway         | U |
| C-X3-C motif chemokine receptor 1(CX3CR1)                         | bta04062:Chemokine signaling pathway         | U |
| C-C motif chemokine ligand 5(CCL5)                                | bta04062:Chemokine signaling pathway         | U |
| chemokine (C-C motif) ligand 3(CCL3)                              | bta04062:Chemokine signaling pathway         | U |
| chemokine (C-C motif) ligand 4(CCL4)                              | bta04062:Chemokine signaling pathway         | U |
| pro-platelet basic protein(PPBP)                                  | bta04062:Chemokine signaling pathway         | U |
| C-X-C motif chemokine receptor 2(CXCR2)                           | bta04062:Chemokine signaling pathway         | U |
| MHC class I heavy chain(BOLA)                                     | bta04514:Cell adhesion molecules (CAMs)      | D |
| netrin G2(NTNG2)                                                  | bta04514:Cell adhesion molecules (CAMs)      | D |
| intercellular adhesion molecule 1(ICAM1)                          | bta04514:Cell adhesion molecules (CAMs)      | D |
| L1 cell adhesion molecule(L1CAM)                                  | bta04514:Cell adhesion molecules (CAMs)      | D |
| contactin associated protein 1(CNTNAP1)                           | bta04514:Cell adhesion molecules (CAMs)      | D |
| CD276 molecule(CD276)                                             | bta04514:Cell adhesion molecules (CAMs)      | D |
| vascular cell adhesion molecule 1-like(LOC534578)                 | bta04514:Cell adhesion molecules (CAMs)      | D |
| major histocompatibility complex, class II, DQ alpha 5(BOLA-DQA5) | bta04514:Cell adhesion molecules (CAMs)      | D |
| CD274 molecule(CD274)                                             | bta04514:Cell adhesion molecules (CAMs)      | D |
| CD4 molecule(CD4)                                                 | bta04514:Cell adhesion molecules (CAMs)      | U |
| integrin subunit alpha L(ITGAL)                                   | bta04514:Cell adhesion molecules (CAMs)      | U |
| CD8b molecule(CD8B)                                               | bta04514:Cell adhesion molecules (CAMs)      | U |
| intercellular adhesion molecule 3(ICAM3)                          | bta04514:Cell adhesion molecules (CAMs)      | U |
| cadherin 1(CDH1)                                                  | bta04514:Cell adhesion molecules (CAMs)      | U |
| F11 receptor(F11R)                                                | bta04514:Cell adhesion molecules (CAMs)      | U |
| MHC class II antigen(BLA-DQB)                                     | bta04514:Cell adhesion molecules (CAMs)      | U |
| MHC Class I JSP.1(JSP.1)                                          | bta04514:Cell adhesion molecules (CAMs)      | U |
| CD8a molecule(CD8A)                                               | bta04514:Cell adhesion molecules (CAMs)      | U |
| sialophorin(SPN)                                                  | bta04514:Cell adhesion molecules (CAMs)      | U |
| selectin P ligand(SELPLG)                                         | bta04514:Cell adhesion molecules (CAMs)      | U |
| junctional adhesion molecule 2(JAM2)                              | bta04514:Cell adhesion molecules (CAMs)      | U |
| colony stimulating factor 1(CSF1)                                 | bta04610:Complement and coagulation cascades | D |
| KIT proto-oncogene receptor tyrosine kinase(KIT)                  | bta04610:Complement and coagulation cascades | D |
| interleukin 9 receptor(IL9R)                                      | bta04610:Complement and coagulation cascades | D |
| CD59 molecule(CD59)                                               | bta04610:Complement and coagulation cascades | U |
| CD4 molecule(CD4)                                                 | bta04610:Complement and coagulation cascades | U |
| CD33 antigen-like(LOC100138951)                                   | bta04610:Complement and coagulation cascades | U |
| CD8b molecule(CD8B)                                               | bta04610:Complement and coagulation cascades | U |
| CD8a molecule(CD8A)                                               | bta04610:Complement and coagulation cascades | U |
| interleukin 9 receptor(IL9R)                                      | bta04612:Antigen processing and presentation | D |
| chemokine (C-C motif) ligand 8(CCL8)                              | bta04612:Antigen processing and presentation | D |
| MHC class I heavy chain(BOLA)                                     | bta04612:Antigen processing and presentation | D |
| major histocompatibility complex, class II, DQ alpha 5(BOLA-DQA5) | bta04612:Antigen processing and presentation | D |
| C-X-C motif chemokine ligand 10(CXCL10)                           | bta04612:Antigen processing and presentation | D |
| activin A receptor type 1(ACVR1)                                  | bta04612:Antigen processing and presentation | U |
| chemokine (C-C motif) ligand 3(CCL3)                              | bta04612:Antigen processing and presentation | U |
| chemokine (C-C motif) ligand 4(CCL4)                              | bta04612:Antigen processing and presentation | U |
| pro-platelet basic protein(PPBP)                                  | bta04612:Antigen processing and presentation | U |
| C-X-C motif chemokine receptor 2(CXCR2)                           | bta04612:Antigen processing and presentation | U |
| CD4 molecule(CD4)                                                 | bta04612:Antigen processing and presentation | U |
| CD8b molecule(CD8B)                                               | bta04612:Antigen processing and presentation | U |

|                                                                   |                                               |   |
|-------------------------------------------------------------------|-----------------------------------------------|---|
| MHC class II antigen(BLA-DQB)                                     | bta04612:Antigen processing and presentation  | U |
| MHC Class I JSP.1(JSP.1)                                          | bta04612:Antigen processing and presentation  | U |
| CD8a molecule(CD8A)                                               | bta04612:Antigen processing and presentation  | U |
| Fos proto-oncogene, AP-1 transcription factor subunit(FOS)        | bta04620:Toll-like receptor signaling pathway | D |
| mitogen-activated protein kinase kinase kinase 8(MAP3K8)          | bta04620:Toll-like receptor signaling pathway | D |
| NFKB inhibitor alpha(NFKBIA)                                      | bta04620:Toll-like receptor signaling pathway | D |
| Fas associated via death domain(FADD)                             | bta04620:Toll-like receptor signaling pathway | D |
| C-C motif chemokine ligand 5(CCL5)                                | bta04620:Toll-like receptor signaling pathway | U |
| chemokine (C-C motif) ligand 3(CCL3)                              | bta04620:Toll-like receptor signaling pathway | U |
| chemokine (C-C motif) ligand 4(CCL4)                              | bta04620:Toll-like receptor signaling pathway | U |
| complement C1q A chain(C1QA)                                      | bta04640:Hematopoietic cell lineage           | D |
| complement C8 gamma chain(C8G)                                    | bta04640:Hematopoietic cell lineage           | D |
| antigen-presenting glycoprotein CD1d(LOC782367)                   | bta04640:Hematopoietic cell lineage           | U |
| complement C3d receptor 2(CR2)                                    | bta04640:Hematopoietic cell lineage           | U |
| CD24 molecule(CD24)                                               | bta04640:Hematopoietic cell lineage           | U |
| CD59 molecule(CD59)                                               | bta04640:Hematopoietic cell lineage           | U |
| complement C1q C chain(C1QC)                                      | bta04640:Hematopoietic cell lineage           | U |
| complement C1q B chain(C1QB)                                      | bta04640:Hematopoietic cell lineage           | U |
| serpin family G member 1(SERPING1)                                | bta04640:Hematopoietic cell lineage           | U |
| complement C5a receptor 1(C5AR1)                                  | bta04640:Hematopoietic cell lineage           | U |
| complement C3d receptor 2(CR2)                                    | bta04640:Hematopoietic cell lineage           | U |
| colony stimulating factor 1(CSF1)                                 | bta04668:TNF signaling pathway                | D |
| TNF alpha induced protein 3(TNFAIP3)                              | bta04668:TNF signaling pathway                | D |
| C-X-C motif chemokine ligand 10(CXCL10)                           | bta04668:TNF signaling pathway                | D |
| Fos proto-oncogene, AP-1 transcription factor subunit(FOS)        | bta04668:TNF signaling pathway                | D |
| cAMP responsive element binding protein 3 like 1(CREB3L1)         | bta04668:TNF signaling pathway                | D |
| suppressor of cytokine signaling 3(SOCS3)                         | bta04668:TNF signaling pathway                | D |
| B-cell CLL/lymphoma 3(BCL3)                                       | bta04668:TNF signaling pathway                | D |
| intercellular adhesion molecule 1(ICAM1)                          | bta04668:TNF signaling pathway                | D |
| mitogen-activated protein kinase kinase kinase 8(MAP3K8)          | bta04668:TNF signaling pathway                | D |
| JunB proto-oncogene, AP-1 transcription factor subunit(JUNB)      | bta04668:TNF signaling pathway                | D |
| NFKB inhibitor alpha(NFKBIA)                                      | bta04668:TNF signaling pathway                | D |
| Fas associated via death domain(FADD)                             | bta04668:TNF signaling pathway                | D |
| vascular cell adhesion molecule 1-like(LOC534578)                 | bta04668:TNF signaling pathway                | D |
| C-C motif chemokine ligand 5(CCL5)                                | bta04668:TNF signaling pathway                | U |
| matrix metalloproteinase 9(MMP9)                                  | bta04668:TNF signaling pathway                | U |
| complement C1q A chain(C1QA)                                      | bta05150:Staphylococcus aureus infection      | D |
| intercellular adhesion molecule 1(ICAM1)                          | bta05150:Staphylococcus aureus infection      | D |
| major histocompatibility complex, class II, DQ alpha 5(BOLA-DQA5) | bta05150:Staphylococcus aureus infection      | D |
| integrin subunit alpha L(ITGAL)                                   | bta05150:Staphylococcus aureus infection      | U |
| complement C1q C chain(C1QC)                                      | bta05150:Staphylococcus aureus infection      | U |
| complement C1q B chain(C1QB)                                      | bta05150:Staphylococcus aureus infection      | U |
| MHC class II antigen(BLA-DQB)                                     | bta05150:Staphylococcus aureus infection      | U |
| complement C5a receptor 1(C5AR1)                                  | bta05150:Staphylococcus aureus infection      | U |
| platelet activating factor receptor(PTAFR)                        | bta05150:Staphylococcus aureus infection      | U |
| selectin P ligand(SELPLG)                                         | bta05150:Staphylococcus aureus infection      | U |

---

#### Immunity associated pathways and genes (H vs. L)

---

| Genes | Pathways | Regulation status |
|-------|----------|-------------------|
|-------|----------|-------------------|

---

|                                                                      |                                                 |   |
|----------------------------------------------------------------------|-------------------------------------------------|---|
| interleukin 5 receptor subunit alpha(IL5RA)                          | bta04640:Hematopoietic cell lineage             | D |
| interleukin 1 receptor type 2(IL1R2)                                 | bta04640:Hematopoietic cell lineage             | U |
| interleukin 9 receptor(IL9R)                                         | bta04640:Hematopoietic cell lineage             | U |
| CD8b molecule(CD8B)                                                  | bta04640:Hematopoietic cell lineage             | D |
| CD7 molecule(CD7)                                                    | bta04640:Hematopoietic cell lineage             | U |
| CD22 molecule(CD22)                                                  | bta04640:Hematopoietic cell lineage             | D |
| colony stimulating factor 1 receptor(CSF1R)                          | bta04640:Hematopoietic cell lineage             | U |
| CD9 molecule(CD9)                                                    | bta04640:Hematopoietic cell lineage             | U |
| CD14 molecule(CD14)                                                  | bta04640:Hematopoietic cell lineage             | U |
| CD36 molecule(CD36)                                                  | bta04640:Hematopoietic cell lineage             | U |
| CD8a molecule(CD8A)                                                  | bta04640:Hematopoietic cell lineage             | D |
| complement C3d receptor 2(CR2)                                       | bta04640:Hematopoietic cell lineage             | D |
| CD24 molecule(CD24)                                                  | bta04640:Hematopoietic cell lineage             | U |
| CD1a molecule-like(LOC515418)                                        | bta04640:Hematopoietic cell lineage             | D |
| MHC class I heavy chain(BOLA)                                        | bta04514:Cell adhesion molecules (CAMs)         | U |
| junctional adhesion molecule 3(JAM3)                                 | bta04514:Cell adhesion molecules (CAMs)         | U |
| CD8b molecule(CD8B)                                                  | bta04514:Cell adhesion molecules (CAMs)         | D |
| CD22 molecule(CD22)                                                  | bta04514:Cell adhesion molecules (CAMs)         | D |
| L1 cell adhesion molecule(L1CAM)                                     | bta04514:Cell adhesion molecules (CAMs)         | U |
| versican(VCAN)                                                       | bta04514:Cell adhesion molecules (CAMs)         | U |
| nectin cell adhesion molecule 2(NECTIN2)                             | bta04514:Cell adhesion molecules (CAMs)         | U |
| cadherin 1(CDH1)                                                     | bta04514:Cell adhesion molecules (CAMs)         | D |
| contactin associated protein 1(CNTNAP1)                              | bta04514:Cell adhesion molecules (CAMs)         | U |
| intercellular adhesion molecule 2(LOC104968494)                      | bta04514:Cell adhesion molecules (CAMs)         | D |
| CD276 molecule(CD276)                                                | bta04514:Cell adhesion molecules (CAMs)         | U |
| CD8a molecule(CD8A)                                                  | bta04514:Cell adhesion molecules (CAMs)         | D |
| major histocompatibility complex, class II, DQ alpha<br>5(BOLA-DQA5) | bta04514:Cell adhesion molecules (CAMs)         | D |
| claudin 3(CLDN3)                                                     | bta04514:Cell adhesion molecules (CAMs)         | D |
| interleukin 5 receptor subunit alpha(IL5RA)                          | bta04060:Cytokine-cytokine receptor interaction | D |
| C-X3-C motif chemokine receptor 1(CX3CR1)                            | bta04060:Cytokine-cytokine receptor interaction | D |
| TNF receptor superfamily member 1A(TNFRSF1A)                         | bta04060:Cytokine-cytokine receptor interaction | U |
| C-X-C motif chemokine ligand 12(CXCL12)                              | bta04060:Cytokine-cytokine receptor interaction | U |
| interleukin 1 receptor type 2(IL1R2)                                 | bta04060:Cytokine-cytokine receptor interaction | U |
| C-C motif chemokine ligand 5(CCL5)                                   | bta04060:Cytokine-cytokine receptor interaction | D |
| interleukin 9 receptor(IL9R)                                         | bta04060:Cytokine-cytokine receptor interaction | U |
| colony stimulating factor 1 receptor(CSF1R)                          | bta04060:Cytokine-cytokine receptor interaction | U |
| interleukin 1 receptor accessory protein(IL1RAP)                     | bta04060:Cytokine-cytokine receptor interaction | U |
| activin A receptor type 1B(ACVR1B)                                   | bta04060:Cytokine-cytokine receptor interaction | U |
| hepatocyte growth factor(HGF)                                        | bta04060:Cytokine-cytokine receptor interaction | U |
| interleukin 15(IL15)                                                 | bta04060:Cytokine-cytokine receptor interaction | D |
| interleukin 13 receptor, alpha 1(IL13RA1)                            | bta04060:Cytokine-cytokine receptor interaction | U |
| chemokine (C-C motif) receptor 1(CCR1)                               | bta04060:Cytokine-cytokine receptor interaction | U |
| TNF receptor superfamily member 21(TNFRSF21)                         | bta04060:Cytokine-cytokine receptor interaction | D |
| chemokine (C-C motif) ligand 4(CCL4)                                 | bta04060:Cytokine-cytokine receptor interaction | D |
| interleukin 18 receptor accessory protein(IL18RAP)                   | bta04060:Cytokine-cytokine receptor interaction | U |
| C-X-C motif chemokine receptor 5(CXCR5)                              | bta04060:Cytokine-cytokine receptor interaction | D |
| TNF receptor superfamily member 1A(TNFRSF1A)                         | bta04668:TNF signaling pathway                  | U |
| cAMP responsive element binding protein 3 like<br>1(CREB3L1)         | bta04668:TNF signaling pathway                  | U |
| C-C motif chemokine ligand 5(CCL5)                                   | bta04668:TNF signaling pathway                  | D |

|                                                                                    |                                                  |   |
|------------------------------------------------------------------------------------|--------------------------------------------------|---|
| mitogen-activated protein kinase 13(MAPK13)                                        | bta04668:TNF signaling pathway                   | U |
| interferon gamma inducible protein 47(IFI47)                                       | bta04668:TNF signaling pathway                   | D |
| interleukin 15(IL15)                                                               | bta04668:TNF signaling pathway                   | D |
| matrix metalloproteinase 9(MMP9)                                                   | bta04668:TNF signaling pathway                   | U |
| nucleotide binding oligomerization domain containing 2(NOD2)                       | bta04668:TNF signaling pathway                   | U |
| chemokine (C-X-C motif) ligand 2(CXCL2)                                            | bta04668:TNF signaling pathway                   | U |
| B-cell CLL/lymphoma 6(BCL6)                                                        | bta05202:Transcriptional misregulation in cancer | U |
| interleukin 1 receptor type 2(IL1R2)                                               | bta05202:Transcriptional misregulation in cancer | U |
| cyclin dependent kinase inhibitor 1A(CDKN1A)                                       | bta05202:Transcriptional misregulation in cancer | U |
| tetraspanin 7(TSPAN7)                                                              | bta05202:Transcriptional misregulation in cancer | U |
| colony stimulating factor 1 receptor(CSF1R)                                        | bta05202:Transcriptional misregulation in cancer | U |
| CD14 molecule(CD14)                                                                | bta05202:Transcriptional misregulation in cancer | U |
| retinoid X receptor alpha(RXRA)                                                    | bta05202:Transcriptional misregulation in cancer | U |
| DEAD-box helicase 5(DDX5)                                                          | bta05202:Transcriptional misregulation in cancer | D |
| matrix metalloproteinase 9(MMP9)                                                   | bta05202:Transcriptional misregulation in cancer | U |
| insulin like growth factor 1 receptor(IGF1R)                                       | bta05202:Transcriptional misregulation in cancer | U |
| hydroxyprostaglandin dehydrogenase 15-(NAD)(HPGD)                                  | bta05202:Transcriptional misregulation in cancer | D |
| granzyme B (granzyme 2, cytotoxic T-lymphocyte-associated serine esterase 1)(GZMB) | bta05202:Transcriptional misregulation in cancer | D |

---

D: Down-regulated

U: Up-regulated

#### Supplementary file 4. Common genes enriched in pathways

| Groups                                     | Total | Genes ID                                                                                                                                                                                                                                                                                                                                                                                                                                                                                                                                                                                                                                                                         |
|--------------------------------------------|-------|----------------------------------------------------------------------------------------------------------------------------------------------------------------------------------------------------------------------------------------------------------------------------------------------------------------------------------------------------------------------------------------------------------------------------------------------------------------------------------------------------------------------------------------------------------------------------------------------------------------------------------------------------------------------------------|
| high vs control high vs low low vs control | 5     | ENSBTAG00000020676<br>ENSBTAG00000007191<br>ENSBTAG00000038128<br>ENSBTAG00000002923<br>ENSBTAG00000039046                                                                                                                                                                                                                                                                                                                                                                                                                                                                                                                                                                       |
| high vs control low vs control             | 30    | ENSBTAG00000000095<br>ENSBTAG00000038042<br>ENSBTAG00000015742<br>ENSBTAG00000009493<br>ENSBTAG00000037539<br>ENSBTAG00000010520<br>ENSBTAG00000010303<br>ENSBTAG00000002302<br>ENSBTAG00000007153<br>ENSBTAG00000005359<br>ENSBTAG00000032425<br>ENSBTAG00000000130<br>ENSBTAG00000017846<br>ENSBTAG00000001725<br>ENSBTAG00000027051<br>ENSBTAG00000004608<br>ENSBTAG00000024960<br>ENSBTAG00000014113<br>ENSBTAG00000019588<br>ENSBTAG00000011600<br>ENSBTAG00000016683<br>ENSBTAG00000031851<br>ENSBTAG00000000436<br>ENSBTAG00000020872<br>ENSBTAG00000011196<br>ENSBTAG00000008441<br>ENSBTAG00000000283<br>ENSBTAG00000000603<br>ENSBTAG00000020116<br>ENSBTAG00000011909 |
| high vs control high vs low                | 21    | ENSBTAG00000033748<br>ENSBTAG00000015318<br>ENSBTAG00000006343                                                                                                                                                                                                                                                                                                                                                                                                                                                                                                                                                                                                                   |

ENSBTAG00000003176  
ENSBTAG00000014764  
ENSBTAG00000004211  
ENSBTAG00000013555  
ENSBTAG00000020936  
ENSBTAG00000046320  
ENSBTAG00000019338  
ENSBTAG00000012771  
ENSBTAG00000010007  
ENSBTAG00000014906  
ENSBTAG00000017866  
ENSBTAG00000021527  
ENSBTAG00000013205  
ENSBTAG00000027513  
ENSBTAG00000017851  
ENSBTAG00000019428  
ENSBTAG00000015727  
ENSBTAG00000020054  
ENSBTAG00000007558  
ENSBTAG00000038496  
ENSBTAG00000008956  
ENSBTAG00000019097  
ENSBTAG00000021141  
ENSBTAG00000006143  
ENSBTAG00000025257  
ENSBTAG00000015991  
ENSBTAG00000002069  
ENSBTAG00000013462  
ENSBTAG00000019734  
ENSBTAG00000019708  
ENSBTAG00000013334  
ENSBTAG00000044023  
ENSBTAG00000046158  
ENSBTAG00000012599  
ENSBTAG00000013170  
ENSBTAG00000001333  
ENSBTAG00000021077  
ENSBTAG00000048122  
ENSBTAG00000010681  
ENSBTAG00000001034

high vs low low vs control

11

high vs control

66



ENSBTAG00000002758  
ENSBTAG00000021798  
ENSBTAG00000006679  
ENSBTAG00000007268  
ENSBTAG00000019354  
ENSBTAG00000017542  
ENSBTAG00000008409  
ENSBTAG00000021358  
ENSBTAG00000004547  
ENSBTAG00000021647  
ENSBTAG00000013573  
ENSBTAG00000013586  
ENSBTAG00000016758  
ENSBTAG00000035587  
ENSBTAG00000017839  
ENSBTAG00000019716  
ENSBTAG00000009789  
ENSBTAG00000002103  
ENSBTAG00000016345  
ENSBTAG00000012855  
ENSBTAG00000007932  
ENSBTAG00000012544  
ENSBTAG00000000977  
ENSBTAG00000005273  
ENSBTAG00000007193  
ENSBTAG00000011543  
ENSBTAG00000009421  
ENSBTAG00000008300  
ENSBTAG00000017722  
ENSBTAG00000008006  
ENSBTAG00000006998  
ENSBTAG00000018424  
ENSBTAG00000007684  
ENSBTAG00000015133  
ENSBTAG00000019634  
ENSBTAG00000006519  
ENSBTAG00000002767  
ENSBTAG00000007867  
ENSBTAG00000009812  
ENSBTAG00000003289

low vs control

13

ENSBTAG00000003791  
ENSBTAG00000038990  
ENSBTAG00000009498  
ENSBTAG00000012265  
ENSBTAG00000012899  
ENSBTAG00000026753  
ENSBTAG00000032436  
ENSBTAG00000032122  
ENSBTAG00000013489  
ENSBTAG00000020957  
ENSBTAG00000012205  
ENSBTAG00000000563  
ENSBTAG00000020194  
ENSBTAG00000008299  
ENSBTAG00000002742  
ENSBTAG00000009938  
ENSBTAG00000003255  
ENSBTAG00000018274  
ENSBTAG00000026326  
ENSBTAG00000016267  
ENSBTAG00000012046  
ENSBTAG00000007103  
ENSBTAG00000011193  
ENSBTAG00000007235  
ENSBTAG00000025250  
ENSBTAG00000001338  
ENSBTAG00000002699  
ENSBTAG00000004322  
ENSBTAG00000008966  
ENSBTAG00000017664  
ENSBTAG00000005077  
ENSBTAG00000015032  
ENSBTAG00000040432  
ENSBTAG00000039366  
ENSBTAG00000019432  
ENSBTAG00000008353  
ENSBTAG00000000273  
ENSBTAG00000039813  
ENSBTAG00000001511  
ENSBTAG00000011887

high vs low

16

ENSBTAG00000018423

ENSBTAG00000018200

ENSBTAG00000025942

ENSBTAG00000011359

---

## Supplementary file 5. Biological function processes

### High folic acid treated group regulated biological processes

| Term                                                                                               | Count | <i>P</i> -value |
|----------------------------------------------------------------------------------------------------|-------|-----------------|
| GO:0006955~immune response                                                                         | 36    | 1.95E-08        |
| GO:0006954~inflammatory response                                                                   | 33    | 6.42E-07        |
| GO:0030593~neutrophil chemotaxis                                                                   | 14    | 1.51E-06        |
| GO:0070098~chemokine-mediated signaling pathway                                                    | 13    | 4.49E-06        |
| GO:0002523~leukocyte migration involved in inflammatory response                                   | 6     | 1.17E-05        |
| GO:0031623~receptor internalization                                                                | 9     | 2.14E-04        |
| GO:0006935~chemotaxis                                                                              | 11    | 3.88E-04        |
| GO:0070374~positive regulation of ERK1 and ERK2 cascade                                            | 19    | 4.42E-04        |
| GO:0006919~activation of cysteine-type endopeptidase activity involved in apoptotic process        | 10    | 8.81E-04        |
| GO:0048661~positive regulation of smooth muscle cell proliferation                                 | 7     | 9.02E-04        |
| GO:0090026~positive regulation of monocyte chemotaxis                                              | 6     | 1.14E-03        |
| GO:0098869~cellular oxidant detoxification                                                         | 8     | 1.56E-03        |
| GO:0042742~defense response to bacterium                                                           | 13    | 2.14E-03        |
| GO:0007596~blood coagulation                                                                       | 10    | 2.22E-03        |
| GO:0032496~response to lipopolysaccharide                                                          | 13    | 2.64E-03        |
| GO:0048662~negative regulation of smooth muscle cell proliferation                                 | 6     | 2.81E-03        |
| GO:0006915~apoptotic process                                                                       | 23    | 3.25E-03        |
| GO:0050900~leukocyte migration                                                                     | 6     | 3.63E-03        |
| GO:0043066~negative regulation of apoptotic process                                                | 26    | 3.95E-03        |
| GO:0042127~regulation of cell proliferation                                                        | 18    | 4.21E-03        |
| GO:0007155~cell adhesion                                                                           | 20    | 4.92E-03        |
| GO:0019370~leukotriene biosynthetic process                                                        | 4     | 8.47E-03        |
| GO:0050729~positive regulation of inflammatory response                                            | 8     | 9.25E-03        |
| GO:0002292~T cell differentiation involved in immune response                                      | 3     | 9.48E-03        |
| GO:0038094~Fc-gamma receptor signaling pathway                                                     | 3     | 9.48E-03        |
| GO:0001525~angiogenesis                                                                            | 16    | 9.87E-03        |
| GO:0009615~response to virus                                                                       | 8     | 1.19E-02        |
| GO:1902042~negative regulation of extrinsic apoptotic signaling pathway via death domain receptors | 5     | 1.40E-02        |
| GO:0043123~positive regulation of I-kappaB kinase/NF-kappaB signaling                              | 15    | 1.41E-02        |
| GO:0042060~wound healing                                                                           | 7     | 1.56E-02        |
| GO:0030889~negative regulation of B cell proliferation                                             | 4     | 1.67E-02        |
| GO:0032495~response to muramyl dipeptide                                                           | 4     | 1.67E-02        |
| GO:0097067~cellular response to thyroid hormone stimulus                                           | 4     | 1.67E-02        |
| GO:0060326~cell chemotaxis                                                                         | 8     | 1.69E-02        |
| GO:0050715~positive regulation of cytokine secretion                                               | 5     | 1.72E-02        |
| GO:0090307~mitotic spindle assembly                                                                | 6     | 2.01E-02        |
| GO:0045087~innate immune response                                                                  | 22    | 2.09E-02        |
| GO:0006979~response to oxidative stress                                                            | 9     | 2.26E-02        |
| GO:0019882~antigen processing and presentation                                                     | 6     | 2.31E-02        |
| GO:0045766~positive regulation of angiogenesis                                                     | 11    | 2.33E-02        |
| GO:0021762~substantia nigra development                                                            | 6     | 2.65E-02        |
| GO:0007010~cytoskeleton organization                                                               | 10    | 2.72E-02        |
| GO:0007076~mitotic chromosome condensation                                                         | 4     | 2.80E-02        |

|                                                                                         |    |          |
|-----------------------------------------------------------------------------------------|----|----------|
| GO:0030193~regulation of blood coagulation                                              | 4  | 2.80E-02 |
| GO:0002690~positive regulation of leukocyte chemotaxis                                  | 4  | 2.80E-02 |
| GO:0030574~collagen catabolic process                                                   | 4  | 2.80E-02 |
| GO:0006911~phagocytosis, engulfment                                                     | 4  | 2.80E-02 |
| GO:0042119~neutrophil activation                                                        | 3  | 2.93E-02 |
| GO:0001913~T cell mediated cytotoxicity                                                 | 3  | 2.93E-02 |
| GO:0032494~response to peptidoglycan                                                    | 3  | 2.93E-02 |
| GO:1900746~regulation of vascular endothelial growth factor signaling pathway           | 3  | 2.93E-02 |
| GO:0090501~RNA phosphodiester bond hydrolysis                                           | 3  | 2.93E-02 |
| GO:0070234~positive regulation of T cell apoptotic process                              | 3  | 2.93E-02 |
| GO:0048247~lymphocyte chemotaxis                                                        | 5  | 3.44E-02 |
| GO:0046579~positive regulation of Ras protein signal transduction                       | 4  | 3.49E-02 |
| GO:0006402~mRNA catabolic process                                                       | 4  | 3.49E-02 |
| GO:0007050~cell cycle arrest                                                            | 8  | 4.00E-02 |
| GO:0050862~positive regulation of T cell receptor signaling pathway                     | 3  | 4.22E-02 |
| GO:0046007~negative regulation of activated T cell proliferation                        | 3  | 4.22E-02 |
| GO:0070233~negative regulation of T cell apoptotic process                              | 3  | 4.22E-02 |
| GO:0010886~positive regulation of cholesterol storage                                   | 3  | 4.22E-02 |
| GO:0045190~isotype switching                                                            | 4  | 4.26E-02 |
| GO:0071356~cellular response to tumor necrosis factor                                   | 8  | 4.71E-02 |
| GO:0055085~transmembrane transport                                                      | 12 | 5.07E-02 |
| GO:0030308~negative regulation of cell growth                                           | 10 | 5.09E-02 |
| GO:0001974~blood vessel remodeling                                                      | 5  | 5.20E-02 |
| GO:0071346~cellular response to interferon-gamma                                        | 6  | 5.30E-02 |
| GO:0016310~phosphorylation                                                              | 6  | 5.30E-02 |
| GO:0007288~sperm axoneme assembly                                                       | 3  | 5.69E-02 |
| GO:0035357~peroxisome proliferator activated receptor signaling pathway                 | 3  | 5.69E-02 |
| GO:0050702~interleukin-1 beta secretion                                                 | 3  | 5.69E-02 |
| GO:0000122~negative regulation of transcription from RNA polymerase II promoter         | 33 | 6.18E-02 |
| GO:0006974~cellular response to DNA damage stimulus                                     | 12 | 6.25E-02 |
| GO:0071456~cellular response to hypoxia                                                 | 7  | 6.51E-02 |
| GO:0050821~protein stabilization                                                        | 11 | 6.74E-02 |
| GO:0042832~defense response to protozoan                                                | 4  | 7.01E-02 |
| GO:0050727~regulation of inflammatory response                                          | 6  | 7.05E-02 |
| GO:0050892~intestinal absorption                                                        | 3  | 7.31E-02 |
| GO:0071404~cellular response to low-density lipoprotein particle stimulus               | 3  | 7.31E-02 |
| GO:0010744~positive regulation of macrophage derived foam cell differentiation          | 3  | 7.31E-02 |
| GO:1900017~positive regulation of cytokine production involved in inflammatory response | 3  | 7.31E-02 |
| GO:0045806~negative regulation of endocytosis                                           | 3  | 7.31E-02 |
| GO:0031663~lipopolysaccharide-mediated signaling pathway                                | 5  | 7.37E-02 |
| GO:0032755~positive regulation of interleukin-6 production                              | 6  | 7.69E-02 |
| GO:0043401~steroid hormone mediated signaling pathway                                   | 4  | 8.07E-02 |
| GO:0001816~cytokine production                                                          | 4  | 8.07E-02 |
| GO:0007611~learning or memory                                                           | 4  | 8.07E-02 |
| GO:0032733~positive regulation of interleukin-10 production                             | 4  | 8.07E-02 |
| GO:0002548~monocyte chemotaxis                                                          | 5  | 8.18E-02 |
| GO:0006816~calcium ion transport                                                        | 6  | 8.37E-02 |

|                                                                                                    |    |          |
|----------------------------------------------------------------------------------------------------|----|----------|
| GO:0010880~regulation of release of sequestered calcium ion into cytosol by sarcoplasmic reticulum | 3  | 9.05E-02 |
| GO:0032703~negative regulation of interleukin-2 production                                         | 3  | 9.05E-02 |
| GO:0008015~blood circulation                                                                       | 3  | 9.05E-02 |
| GO:0006750~glutathione biosynthetic process                                                        | 3  | 9.05E-02 |
| GO:0002376~immune system process                                                                   | 3  | 9.05E-02 |
| GO:0043303~mast cell degranulation                                                                 | 3  | 9.05E-02 |
| GO:0034599~cellular response to oxidative stress                                                   | 6  | 9.07E-02 |
| GO:0090023~positive regulation of neutrophil chemotaxis                                            | 4  | 9.19E-02 |
| GO:0032715~negative regulation of interleukin-6 production                                         | 4  | 9.19E-02 |
| GO:0032508~DNA duplex unwinding                                                                    | 4  | 9.19E-02 |
| GO:0050728~negative regulation of inflammatory response                                            | 7  | 9.38E-02 |
| GO:0007507~heart development                                                                       | 11 | 9.53E-02 |
| GO:0010862~positive regulation of pathway-restricted SMAD protein phosphorylation                  | 6  | 9.81E-02 |
| GO:0007080~mitotic metaphase plate congression                                                     | 5  | 9.92E-02 |

### Low folic acid treated group regulated biological processes

| Term                                                                 | Count | P-value  |
|----------------------------------------------------------------------|-------|----------|
| GO:0019370~leukotriene biosynthetic process                          | 6     | 8.21E-07 |
| GO:0050850~positive regulation of calcium-mediated signaling         | 6     | 5.33E-05 |
| GO:0050900~leukocyte migration                                       | 6     | 1.33E-04 |
| GO:0070098~chemokine-mediated signaling pathway                      | 8     | 1.85E-04 |
| GO:0030593~neutrophil chemotaxis                                     | 8     | 2.82E-04 |
| GO:0006955~immune response                                           | 17    | 3.19E-04 |
| GO:0006954~inflammatory response                                     | 17    | 3.19E-04 |
| GO:0043001~Golgi to plasma membrane protein transport                | 5     | 1.96E-03 |
| GO:0048247~lymphocyte chemotaxis                                     | 5     | 2.83E-03 |
| GO:0071346~cellular response to interferon-gamma                     | 6     | 2.92E-03 |
| GO:0070374~positive regulation of ERK1 and ERK2 cascade              | 11    | 3.25E-03 |
| GO:0007166~cell surface receptor signaling pathway                   | 12    | 3.50E-03 |
| GO:2000503~positive regulation of natural killer cell chemotaxis     | 3     | 4.40E-03 |
| GO:0071356~cellular response to tumor necrosis factor                | 7     | 5.16E-03 |
| GO:0050729~positive regulation of inflammatory response              | 6     | 5.76E-03 |
| GO:0002548~monocyte chemotaxis                                       | 5     | 7.89E-03 |
| GO:0071347~cellular response to interleukin-1                        | 6     | 9.29E-03 |
| GO:0006935~chemotaxis                                                | 6     | 1.10E-02 |
| GO:0006906~vesicle fusion                                            | 6     | 1.30E-02 |
| GO:0001775~cell activation                                           | 3     | 1.46E-02 |
| GO:0006909~phagocytosis                                              | 5     | 1.53E-02 |
| GO:0010628~positive regulation of gene expression                    | 10    | 1.71E-02 |
| GO:2000352~negative regulation of endothelial cell apoptotic process | 4     | 2.18E-02 |
| GO:0007155~cell adhesion                                             | 11    | 2.20E-02 |
| GO:0006508~proteolysis                                               | 11    | 2.36E-02 |
| GO:0045087~innate immune response                                    | 13    | 2.41E-02 |
| GO:0001817~regulation of cytokine production                         | 3     | 2.41E-02 |
| GO:0010759~positive regulation of macrophage chemotaxis              | 3     | 2.96E-02 |

|                                                                                                                        |    |          |
|------------------------------------------------------------------------------------------------------------------------|----|----------|
| GO:0045766~positive regulation of angiogenesis                                                                         | 7  | 3.01E-02 |
| GO:0009615~response to virus                                                                                           | 5  | 3.27E-02 |
| GO:0045165~cell fate commitment                                                                                        | 5  | 3.51E-02 |
| GO:1903352~L-ornithine transmembrane transport                                                                         | 3  | 3.55E-02 |
| GO:1900745~positive regulation of p38MAPK cascade                                                                      | 3  | 3.55E-02 |
| GO:0006887~exocytosis                                                                                                  | 5  | 3.77E-02 |
| GO:0031663~lipopolysaccharide-mediated signaling pathway                                                               | 4  | 4.12E-02 |
| GO:0048565~digestive tract development                                                                                 | 4  | 4.12E-02 |
| GO:0002690~positive regulation of leukocyte chemotaxis                                                                 | 3  | 4.19E-02 |
| GO:0043922~negative regulation by host of viral transcription                                                          | 3  | 4.86E-02 |
| GO:0060707~trophoblast giant cell differentiation                                                                      | 3  | 4.86E-02 |
| GO:0071277~cellular response to calcium ion                                                                            | 4  | 4.90E-02 |
| GO:0048791~calcium ion-regulated exocytosis of neurotransmitter                                                        | 4  | 5.32E-02 |
| GO:0060374~mast cell differentiation                                                                                   | 2  | 5.45E-02 |
| GO:0061290~canonical Wnt signaling pathway involved in metanephric kidney development                                  | 2  | 5.45E-02 |
| GO:0032507~maintenance of protein location in cell                                                                     | 2  | 5.45E-02 |
| GO:0002540~leukotriene production involved in inflammatory response                                                    | 2  | 5.45E-02 |
| GO:0023014~signal transduction by protein phosphorylation                                                              | 3  | 5.57E-02 |
| GO:0051928~positive regulation of calcium ion transport                                                                | 3  | 5.57E-02 |
| GO:0071407~cellular response to organic cyclic compound                                                                | 4  | 6.20E-02 |
| GO:0050832~defense response to fungus                                                                                  | 3  | 6.31E-02 |
| GO:0050728~negative regulation of inflammatory response                                                                | 5  | 6.51E-02 |
| GO:0009314~response to radiation                                                                                       | 3  | 7.08E-02 |
| GO:0045773~positive regulation of axon extension                                                                       | 3  | 7.08E-02 |
| GO:0009636~response to toxic substance                                                                                 | 4  | 7.15E-02 |
| GO:0007204~positive regulation of cytosolic calcium ion concentration                                                  | 5  | 7.23E-02 |
| GO:0032496~response to lipopolysaccharide                                                                              | 6  | 7.96E-02 |
| GO:0043066~negative regulation of apoptotic process                                                                    | 12 | 8.00E-02 |
| GO:2000269~regulation of fibroblast apoptotic process                                                                  | 2  | 8.06E-02 |
| GO:0034140~negative regulation of toll-like receptor 3 signaling pathway                                               | 2  | 8.06E-02 |
| GO:0014070~response to organic cyclic compound                                                                         | 2  | 8.06E-02 |
| GO:1904468~negative regulation of tumor necrosis factor secretion                                                      | 2  | 8.06E-02 |
| GO:0061179~negative regulation of insulin secretion involved in cellular response to glucose stimulus                  | 2  | 8.06E-02 |
| GO:0003006~developmental process involved in reproduction                                                              | 2  | 8.06E-02 |
| GO:0000453~enzyme-directed rRNA 2'-O-methylation                                                                       | 2  | 8.06E-02 |
| GO:0045415~negative regulation of interleukin-8 biosynthetic process                                                   | 2  | 8.06E-02 |
| GO:0010871~negative regulation of receptor biosynthetic process                                                        | 2  | 8.06E-02 |
| GO:1900122~positive regulation of receptor binding                                                                     | 2  | 8.06E-02 |
| GO:0001878~response to yeast                                                                                           | 2  | 8.06E-02 |
| GO:0042518~negative regulation of tyrosine phosphorylation of Stat3 protein                                            | 2  | 8.06E-02 |
| GO:0002291~T cell activation via T cell receptor contact with antigen bound to MHC molecule on antigen presenting cell | 2  | 8.06E-02 |
| GO:0048538~thymus development                                                                                          | 4  | 8.16E-02 |

|                                                                    |   |          |
|--------------------------------------------------------------------|---|----------|
| GO:0048662~negative regulation of smooth muscle cell proliferation | 3 | 8.71E-02 |
| GO:0031295~T cell costimulation                                    | 3 | 8.71E-02 |
| GO:0045600~positive regulation of fat cell differentiation         | 4 | 9.23E-02 |
| GO:0032689~negative regulation of interferon-gamma production      | 3 | 9.57E-02 |
| GO:0034198~cellular response to amino acid starvation              | 3 | 9.57E-02 |
| GO:0046580~negative regulation of Ras protein signal transduction  | 3 | 9.57E-02 |
| GO:0006869~lipid transport                                         | 4 | 9.78E-02 |

### High vs. low folic acid treated group regulated biological processes

| Term                                                                                             | Count | P-value  |
|--------------------------------------------------------------------------------------------------|-------|----------|
| GO:0006954~inflammatory response                                                                 | 21    | 3.36E-05 |
| GO:0006955~immune response                                                                       | 19    | 3.09E-04 |
| GO:0098869~cellular oxidant detoxification                                                       | 7     | 4.76E-04 |
| GO:0002523~leukocyte migration involved in inflammatory response                                 | 4     | 1.16E-03 |
| GO:0090026~positive regulation of monocyte chemotaxis                                            | 5     | 1.23E-03 |
| GO:0019370~leukotriene biosynthetic process                                                      | 4     | 1.81E-03 |
| GO:0030308~negative regulation of cell growth                                                    | 10    | 1.87E-03 |
| GO:0050729~positive regulation of inflammatory response                                          | 7     | 2.49E-03 |
| GO:0070098~chemokine-mediated signaling pathway                                                  | 7     | 3.17E-03 |
| GO:0016310~phosphorylation                                                                       | 6     | 6.42E-03 |
| GO:0042771~intrinsic apoptotic signaling pathway in response to DNA damage by p53 class mediator | 5     | 6.48E-03 |
| GO:0043922~negative regulation by host of viral transcription                                    | 4     | 8.16E-03 |
| GO:0045087~innate immune response                                                                | 16    | 9.07E-03 |
| GO:0042127~regulation of cell proliferation                                                      | 12    | 9.60E-03 |
| GO:0070374~positive regulation of ERK1 and ERK2 cascade                                          | 11    | 1.15E-02 |
| GO:0051289~protein homotetramerization                                                           | 6     | 1.36E-02 |
| GO:0050850~positive regulation of calcium-mediated signaling                                     | 4     | 1.48E-02 |
| GO:1900165~negative regulation of interleukin-6 secretion                                        | 3     | 1.52E-02 |
| GO:0031623~receptor internalization                                                              | 5     | 1.67E-02 |
| GO:0030318~melanocyte differentiation                                                            | 4     | 1.76E-02 |
| GO:0042742~defense response to bacterium                                                         | 8     | 1.81E-02 |
| GO:0055114~oxidation-reduction process                                                           | 19    | 1.90E-02 |
| GO:0030593~neutrophil chemotaxis                                                                 | 6     | 1.94E-02 |
| GO:0051607~defense response to virus                                                             | 10    | 2.37E-02 |
| GO:0007596~blood coagulation                                                                     | 6     | 2.67E-02 |
| GO:0051260~protein homooligomerization                                                           | 10    | 2.96E-02 |
| GO:0008285~negative regulation of cell proliferation                                             | 14    | 3.00E-02 |
| GO:0008630~intrinsic apoptotic signaling pathway in response to DNA damage                       | 5     | 3.08E-02 |
| GO:0048661~positive regulation of smooth muscle cell proliferation                               | 4     | 3.12E-02 |
| GO:0032729~positive regulation of interferon-gamma production                                    | 5     | 3.36E-02 |
| GO:0038083~peptidyl-tyrosine autophosphorylation                                                 | 5     | 3.98E-02 |
| GO:0072657~protein localization to membrane                                                      | 3     | 4.98E-02 |
| GO:0051017~actin filament bundle assembly                                                        | 4     | 5.40E-02 |
| GO:0043085~positive regulation of catalytic activity                                             | 4     | 5.40E-02 |
| GO:0009615~response to virus                                                                     | 5     | 5.78E-02 |
| GO:0007169~transmembrane receptor protein tyrosine kinase signaling pathway                      | 6     | 6.14E-02 |
| GO:0030335~positive regulation of cell migration                                                 | 9     | 6.16E-02 |



|                                                                            |    |          |
|----------------------------------------------------------------------------|----|----------|
| GO:0070488~neutrophil aggregation                                          | 2  | 6.54E-02 |
| GO:0002793~positive regulation of peptide secretion                        | 2  | 6.54E-02 |
| GO:0015939~pantothenate metabolic process                                  | 2  | 6.54E-02 |
| GO:0002540~leukotriene production involved in inflammatory response        | 2  | 6.54E-02 |
| GO:2000660~negative regulation of interleukin-1-mediated signaling pathway | 2  | 6.54E-02 |
| GO:0007264~small GTPase mediated signal transduction                       | 12 | 6.90E-02 |
| GO:0006914~autophagy                                                       | 5  | 7.03E-02 |
| GO:0071277~cellular response to calcium ion                                | 4  | 7.66E-02 |
| GO:0051928~positive regulation of calcium ion transport                    | 3  | 7.72E-02 |
| GO:0045190~isotype switching                                               | 3  | 7.72E-02 |
| GO:0048791~calcium ion-regulated exocytosis of neurotransmitter            | 4  | 8.28E-02 |
| GO:0032720~negative regulation of tumor necrosis factor production         | 4  | 8.28E-02 |
| GO:0006461~protein complex assembly                                        | 4  | 8.28E-02 |
| GO:0046718~viral entry into host cell                                      | 3  | 8.72E-02 |
| GO:0006906~vesicle fusion                                                  | 5  | 8.91E-02 |
| GO:0042552~myelination                                                     | 4  | 8.92E-02 |
| GO:0001666~response to hypoxia                                             | 6  | 9.56E-02 |
| GO:0032386~regulation of intracellular transport                           | 2  | 9.65E-02 |
| GO:0038094~Fc-gamma receptor signaling pathway                             | 2  | 9.65E-02 |
| GO:0019064~fusion of virus membrane with host plasma membrane              | 2  | 9.65E-02 |
| GO:0006768~biotin metabolic process                                        | 2  | 9.65E-02 |
| GO:0032596~protein transport into membrane raft                            | 2  | 9.65E-02 |
| GO:0002292~T cell differentiation involved in immune response              | 2  | 9.65E-02 |
| GO:0051491~positive regulation of filopodium assembly                      | 3  | 9.75E-02 |

---

## Supplementary file 6. Distribution of genes in biological function processes

| GO TERM     | Function ( High vs. control)                                                            | Total | Up | Down | <i>P-value</i> |
|-------------|-----------------------------------------------------------------------------------------|-------|----|------|----------------|
| GO:0006955  | immune response                                                                         | 36    | 15 | 21   | 1.90E-08       |
| GO:0006954  | inflammatory response                                                                   | 33    | 24 | 9    | 6.40E-07       |
| GO:0030593  | neutrophil chemotaxis                                                                   | 14    | 9  | 5    | 1.50E-06       |
| GO:0070098  | chemokine-mediated signaling pathway                                                    | 13    | 7  | 6    | 4.50E-06       |
| GO:0002523  | leukocyte migration involved in inflammatory response                                   | 6     | 6  |      | 1.20E-05       |
| GO:0031623  | receptor internalization                                                                | 9     | 4  | 5    | 2.10E-04       |
| GO:0006935  | chemotaxis                                                                              | 11    |    | 11   | 3.90E-04       |
| GO:0070374  | positive regulation of ERK1 and ERK2 cascade                                            | 19    | 11 | 8    | 4.40E-04       |
| GO:0006919  | activation of cysteine-type endopeptidase activity involved in apoptotic process        | 10    | 8  | 2    | 8.80E-04       |
| GO:0048661  | positive regulation of smooth muscle cell proliferation                                 | 7     | 6  | 1    | 9.00E-04       |
| GO:0090026  | positive regulation of monocyte chemotaxis                                              | 6     | 5  | 1    | 1.10E-03       |
| GO:0098869  | cellular oxidant detoxification                                                         | 8     | 2  | 6    | 1.60E-03       |
| GO:0042742  | defense response to bacterium                                                           | 13    | 13 |      | 2.10E-03       |
| GO:0007596  | blood coagulation                                                                       | 10    | 5  | 5    | 2.20E-03       |
| GO:0048662  | negative regulation of smooth muscle cell proliferation                                 | 6     | 6  |      | 2.80E-03       |
| GO:0006915  | apoptotic process                                                                       | 23    | 20 | 3    | 3.30E-03       |
| GO:0050900  | leukocyte migration                                                                     | 6     | 3  | 3    | 3.60E-03       |
| GO:0043066  | negative regulation of apoptotic process                                                | 26    | 12 | 14   | 4.00E-03       |
| GO:0042127  | regulation of cell proliferation                                                        | 18    | 12 | 6    | 4.20E-03       |
| GO:0007155  | cell adhesion                                                                           | 20    | 13 | 7    | 4.90E-03       |
| GO:0019370  | leukotriene biosynthetic process                                                        | 4     | 3  | 1    | 8.50E-03       |
| GO:0050729  | positive regulation of inflammatory response                                            | 8     | 5  | 3    | 9.30E-03       |
| GO:0038094  | Fc-gamma receptor signaling pathway                                                     | 3     | 3  |      | 9.50E-03       |
| GO:0002292  | T cell differentiation involved in immune response                                      | 3     | 2  | 1    | 9.50E-03       |
| GO:0009615  | response to virus                                                                       | 8     | 4  | 4    | 1.20E-02       |
| GO:1902042  | negative regulation of extrinsic apoptotic signaling pathway via death domain receptors | 5     | 2  | 3    | 1.40E-02       |
| GO:0043123  | positive regulation of I-kappaB kinase/NF-kappaB signaling                              | 15    | 14 | 1    | 1.40E-02       |
| GO:0042060  | wound healing                                                                           | 7     | 5  | 2    | 1.60E-02       |
| GO:0030889  | negative regulation of B cell proliferation                                             | 4     | 3  | 1    | 1.70E-02       |
| GO:0097067  | cellular response to thyroid hormone stimulus                                           | 4     | 2  | 2    | 1.70E-02       |
| GO:0032495  | response to muramyl dipeptide                                                           | 4     | 4  |      | 1.70E-02       |
| GO:0060326  | cell chemotaxis                                                                         | 8     | 5  | 3    | 1.70E-02       |
| GO:0050715  | positive regulation of cytokine secretion                                               | 5     | 5  |      | 1.70E-02       |
| GO:0045087  | innate immune response                                                                  | 22    | 13 | 9    | 2.10E-02       |
| GO:0006979  | response to oxidative stress                                                            | 9     | 7  | 2    | 2.30E-02       |
| GO:0019882  | antigen processing and presentation                                                     | 6     | 5  | 1    | 2.30E-02       |
| GO:0045766~ | positive regulation of angiogenesis                                                     | 11    | 8  | 3    | 2.30E-02       |
| GO:0030193  | regulation of blood coagulation                                                         | 4     | 4  |      | 2.80E-02       |
| GO:0002690  | positive regulation of leukocyte chemotaxis                                             | 4     | 4  |      | 2.80E-02       |

|            |                                                                    |   |   |   |          |
|------------|--------------------------------------------------------------------|---|---|---|----------|
| GO:0006911 | phagocytosis, engulfment                                           | 4 |   | 4 | 2.80E-02 |
| GO:0030574 | collagen catabolic process                                         | 4 | 3 | 1 | 2.80E-02 |
| GO:0001913 | T cell mediated cytotoxicity                                       | 3 | 3 |   | 2.90E-02 |
| GO:0042119 | neutrophil activation                                              | 3 | 1 | 2 | 2.90E-02 |
| GO:1900746 | regulation of vascular endothelial growth factor signaling pathway | 3 | 1 | 2 | 2.90E-02 |
| GO:0070234 | positive regulation of T cell apoptotic process                    | 3 | 1 | 2 | 2.90E-02 |
| GO:0048247 | lymphocyte chemotaxis                                              | 5 |   | 5 | 3.40E-02 |
| GO:0046007 | negative regulation of activated T cell proliferation              | 3 | 3 |   | 4.20E-02 |
| GO:0050862 | positive regulation of T cell receptor signaling pathway           | 3 | 1 | 2 | 4.20E-02 |
| GO:0070233 | negative regulation of T cell apoptotic process                    | 3 | 2 | 1 | 4.20E-02 |
| GO:0071356 | cellular response to tumor necrosis factor                         | 8 | 4 | 4 | 4.70E-02 |

| GO TERM    | Biological function processes (low vs. control)           | up-regu | down-re | total | p value  |
|------------|-----------------------------------------------------------|---------|---------|-------|----------|
| GO:0019370 | leukotriene biosynthetic process                          | 3       | 3       | 6     | 8.20E-07 |
| GO:0050900 | leukocyte migration                                       | 4       | 2       | 6     | 1.30E-04 |
| GO:0070098 | chemokine-mediated signaling pathway                      | 6       | 2       | 8     | 1.80E-04 |
| GO:0030593 | neutrophil chemotaxis                                     | 7       | 1       | 8     | 2.80E-04 |
| GO:0006954 | immune response                                           | 9       | 8       | 17    | 3.20E-04 |
| GO:0006955 | inflammatory response                                     | 10      | 7       | 17    | 3.20E-04 |
| GO:0048247 | lymphocyte chemotaxis                                     | 4       | 1       | 5     | 2.80E-03 |
| GO:0071346 | cellular response to interferon-gamma                     | 4       | 2       | 6     | 2.90E-03 |
| GO:0070374 | positive regulation of ERK1 and ERK2 cascade              | 8       | 3       | 11    | 3.20E-03 |
| GO:0007166 | cell surface receptor signaling pathway                   | 10      | 2       | 12    | 3.50E-03 |
| GO:2000503 | positive regulation of natural killer cell chemotaxis     | 3       |         | 3     | 4.40E-03 |
| GO:0071356 | cellular response to tumor necrosis factor                | 4       | 3       | 7     | 5.20E-03 |
| GO:0050729 | positive regulation of inflammatory response              | 4       | 2       | 6     | 5.80E-03 |
| GO:0002548 | monocyte chemotaxis                                       | 4       | 1       | 5     | 7.90E-03 |
| GO:0071347 | cellular response to interleukin-1                        | 4       | 2       | 6     | 9.30E-03 |
| GO:0006935 | chemotaxis                                                | 4       | 2       | 6     | 1.10E-02 |
| GO:0001775 | cell activation                                           | 3       |         | 3     | 1.50E-02 |
| GO:0006909 | phagocytosis                                              | 5       |         | 5     | 1.50E-02 |
| GO:0010628 | positive regulation of gene expression                    | 6       | 4       | 10    | 1.70E-02 |
| GO:2000352 | negative regulation of endothelial cell apoptotic process | 1       | 3       | 4     | 2.20E-02 |
| GO:0007155 | cell adhesion                                             | 7       | 4       | 11    | 2.20E-02 |
| GO:0045087 | innate immune response                                    | 7       | 6       | 13    | 2.40E-02 |
| GO:0001817 | regulation of cytokine production                         | 2       | 1       | 3     | 2.40E-02 |
| GO:0010759 | positive regulation of macrophage chemotaxis              | 2       | 1       | 3     | 3.00E-02 |
| GO:0009615 | response to virus                                         | 2       | 3       | 5     | 3.30E-02 |
| GO:0045165 | cell fate commitment                                      | 1       | 4       | 5     | 3.50E-02 |
| GO:1900745 | positive regulation of p38MAPK cascade                    |         | 3       | 3     | 3.60E-02 |
| GO:0002690 | positive regulation of leukocyte chemotaxis               | 2       | 1       | 3     | 4.20E-02 |

|            |                                                    |   |   |          |
|------------|----------------------------------------------------|---|---|----------|
| GO:0060707 | trophoblast giant cell differentiation             | 3 | 3 | 4.90E-02 |
| GO:0043922 | negative regulation by host of viral transcription | 3 | 3 | 4.90E-02 |

| Biological function                                                                   | Up | Down | Genes hit | <i>P-value</i> |
|---------------------------------------------------------------------------------------|----|------|-----------|----------------|
| inflammatory response                                                                 | 16 | 5    | 21        | 3.40E-05       |
| immune response                                                                       | 10 | 9    | 19        | 3.10E-04       |
| cellular oxidant detoxification                                                       | 6  | 1    | 7         | 4.80E-04       |
| leukocyte migration involved in inflammatory response                                 | 4  |      | 4         | 1.20E-03       |
| positive regulation of monocyte chemotaxis                                            | 4  | 1    | 5         | 1.20E-03       |
| leukotriene biosynthetic process                                                      | 3  | 1    | 4         | 1.80E-03       |
| negative regulation of cell growth                                                    | 6  | 4    | 10        | 1.90E-03       |
| positive regulation of inflammatory response                                          | 4  | 3    | 7         | 2.50E-03       |
| chemokine-mediated signaling pathway                                                  | 3  | 4    | 7         | 3.20E-03       |
| phosphorylation                                                                       | 3  | 3    | 6         | 6.40E-03       |
| intrinsic apoptotic signaling pathway in response to DNA damage by p53 class mediator | 3  | 2    | 5         | 6.50E-03       |
| negative regulation by host of viral transcription                                    | 1  | 3    | 4         | 8.20E-03       |
| innate immune response                                                                | 12 | 4    | 16        | 9.10E-03       |
| regulation of cell proliferation                                                      | 9  | 3    | 12        | 9.60E-03       |
| positive regulation of ERK1 and ERK2 cascade                                          | 8  | 3    | 11        | 1.20E-02       |
| positive regulation of calcium-mediated signaling                                     | 2  | 2    | 4         | 1.50E-02       |
| negative regulation of interleukin-6 secretion                                        | 2  | 1    | 3         | 1.50E-02       |
| receptor internalization                                                              | 5  |      | 5         | 1.70E-02       |
| melanocyte differentiation                                                            | 2  | 2    | 4         | 1.80E-02       |
| defense response to bacterium                                                         | 8  |      | 8         | 1.80E-02       |
| neutrophil chemotaxis                                                                 | 3  | 3    | 6         | 1.90E-02       |
| defense response to virus                                                             | 5  | 5    | 10        | 2.40E-02       |
| blood coagulation                                                                     | 5  | 1    | 6         | 2.70E-02       |
| negative regulation of cell proliferation                                             | 10 | 4    | 14        | 3.00E-02       |
| intrinsic apoptotic signaling pathway in response to DNA damage                       | 1  | 4    | 5         | 3.10E-02       |
| positive regulation of interferon-gamma production                                    | 2  | 3    | 5         | 3.40E-02       |

## Supplementary file 7. Differentially expressed genes

| DEGs regulated by high folic acid treatment |           |          |          |          |          |               |                   |          |
|---------------------------------------------|-----------|----------|----------|----------|----------|---------------|-------------------|----------|
| Gene ID                                     | Gene name | Sample_1 | Sample_2 | Value_1  | Value_2  | Expression    | Log2(fold_change) | P-value  |
| ENSBTAG00000020054                          | TNFRSF21  | A        | C        | 30.3581  | 53.8832  | downregulated | 0.827753          | 0.00195  |
| ENSBTAG00000046320                          | CXCR5     | A        | C        | 14.9812  | 26.8321  | downregulated | 0.840802          | 0.0099   |
| ENSBTAG00000010007                          | MAPK13    | A        | C        | 6.212    | 2.30188  | upregulated   | -1.43225          | 0.0007   |
| ENSBTAG00000048122                          | CFD       | A        | C        | 1950.06  | 924.571  | upregulated   | -1.07666          | 0.00395  |
| ENSBTAG00000033748                          | IL18RAP   | A        | C        | 4.90047  | 2.27766  | upregulated   | -1.10537          | 0.00675  |
| ENSBTAG00000027513                          | CXCL2     | A        | C        | 3.10723  | 0.937682 | upregulated   | -1.72846          | 0.008    |
| ENSBTAG00000020936                          | NOD2      | A        | C        | 4.92626  | 2.83043  | upregulated   | -0.799474         | 0.0089   |
| ENSBTAG00000026753                          | CXCR1     | A        | C        | 71.3766  | 42.0987  | upregulated   | -0.761676         | 0.01165  |
| ENSBTAG00000046158                          | CFB       | A        | C        | 0.829592 | 0.341589 | upregulated   | -1.28014          | 0.03625  |
| ENSBTAG00000000563                          | MyD88     | A        | C        | 118.068  | 80.2043  | upregulated   | -0.557863         | 0.04175  |
| DEGs regulated by low folic acid treatment  |           |          |          |          |          |               |                   |          |
| Gene ID                                     | Gene name | Sample_1 | Sample_2 | Value_1  | Value_2  | Expression    | Log2(fold_change) | P-value  |
| ENSBTAG00000038128                          | BOLA-DQA5 | B        | C        | 22.0171  | 335.876  | downregulated | 3.93123           | 5.00E-05 |
| ENSBTAG00000008441                          | SOCS3     | B        | C        | 26.6102  | 74.5781  | downregulated | 1.48678           | 5.00E-05 |
| ENSBTAG00000001725                          | CXCL10    | B        | C        | 13.7634  | 34.0148  | downregulated | 1.30532           | 0.0002   |
| ENSBTAG000000014113                         | CCL8      | B        | C        | 0.652584 | 5.19669  | downregulated | 2.99336           | 0.00135  |
| ENSBTAG00000016683                          | NFKBIA    | B        | C        | 92.7742  | 166.468  | downregulated | 0.843452          | 0.00465  |
| ENSBTAG00000004322                          | FOS       | B        | C        | 19.5567  | 32.2976  | downregulated | 0.723765          | 0.0061   |
| ENSBTAG00000018274                          | FADD      | B        | C        | 68.9504  | 96.1903  | downregulated | 0.480333          | 0.0301   |
| ENSBTAG00000002699                          | KIT       | B        | C        | 1.16943  | 1.85904  | downregulated | 0.66875           | 0.03685  |
| ENSBTAG00000000283                          | CSF1      | B        | C        | 0.824507 | 1.6442   | downregulated | 0.995784          | 0.04545  |
| ENSBTAG00000020116                          | JSP.1     | B        | C        | 191.113  | 18.5687  | upregulated   | -3.36348          | 5.00E-05 |
| ENSBTAG00000019588                          | BLA-DQB   | B        | C        | 1263.13  | 541.071  | upregulated   | -1.22312          | 0.0003   |
| ENSBTAG00000021141                          | CD8A      | B        | C        | 45.9677  | 26.2183  | upregulated   | -0.810045         | 0.00055  |
| ENSBTAG00000003255                          | CD4       | B        | C        | 166.204  | 99.2697  | upregulated   | -0.743529         | 0.00115  |
| ENSBTAG00000032425                          | PPBP      | B        | C        | 176.966  | 101.16   | upregulated   | -0.806837         | 0.00185  |
| ENSBTAG00000025257                          | CCL4      | B        | C        | 22.019   | 10.8534  | upregulated   | -1.02061          | 0.00545  |
| ENSBTAG00000038042                          | CXCR2     | B        | C        | 77.0515  | 49.6174  | upregulated   | -0.634978         | 0.01015  |
| ENSBTAG00000025250                          | CCL3      | B        | C        | 8.22274  | 4.0114   | upregulated   | -1.03552          | 0.01245  |
| ENSBTAG00000020676                          | MMP9      | B        | C        | 4.15276  | 2.30634  | upregulated   | -0.848466         | 0.0126   |
| ENSBTAG00000020872                          | C5AR1     | B        | C        | 69.9562  | 46.6524  | upregulated   | -0.5845           | 0.01595  |
| ENSBTAG00000027051                          | PTAFR     | B        | C        | 30.2115  | 21.8814  | upregulated   | -0.465393         | 0.04115  |
| ENSBTAG00000031851                          | SELPLG    | B        | C        | 178.132  | 130.633  | upregulated   | -0.447432         | 0.0489   |

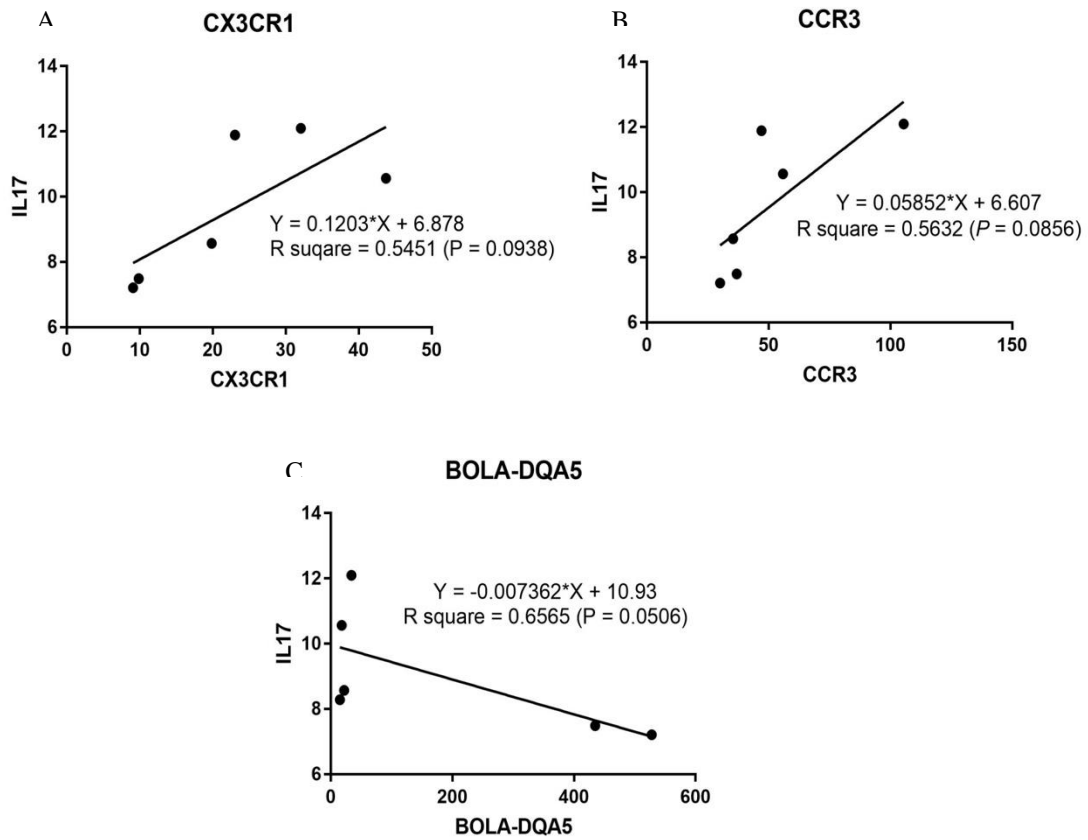

**Supplementary File 8.** The linear regression analyses between serum IL-17 and the expression levels of *CX3CR1* (A), *CCR3* (B), and *BOLA-DQA5* (C).
